30 implicated ticagrelor, one of the P2Y<sub>12</sub> inhibitors, exerted antibacterial activity against  
31 gram-positive bacteria established from clinical evidence that it could reduce the  
32 incidence of infection-related disease. Here we performed 16S rRNA and metagenomic  
33 analysis from patients with unstable angina pectoris (UAP) treated with ticagrelor plus  
34 aspirin or clopidogrel plus aspirin for one month to determine the composition and  
35 functions of the gut microbiome difference between the two main medications. Our  
36 results suggested that the functional peptidoglycan (PGN) and *Staphylococcus aureus*  
37 (*S. aureus*) infection biosynthesis pathways were downregulated with ticagrelor-aspirin  
38 treatment in the gut. Furthermore, we found these changes were accompanied by  
39 increasing peripheral regulatory T cells (Tregs) and ectonucleotidases CD39/CD73  
40 expressions with responding to ameliorating inflammation. To further validate the result,  
41 16S rRNA and metabolomic analysis were carried out upon Western-diet (WD)-fed  
42 *ApoE*<sup>-/-</sup> mice, we found mice treated with ticagrelor plus aspirin exerted optimal  
43 synergistic effects on reducing the plaque burden and ameliorating inflammation  
44 through altered composition and functions of the gut microbiome which keeping in line  
45 with our clinical findings. The current study, for the first time, demonstrated the athero-  
46 protective effect of ticagrelor and displayed its therapeutic value at least partially  
47 attributed to its manipulation of gut microbiota.

48 **Key Words:** Atherosclerosis, gut microbiota, peptidoglycan, regulatory T cells,  
49 inflammation

50

51

52

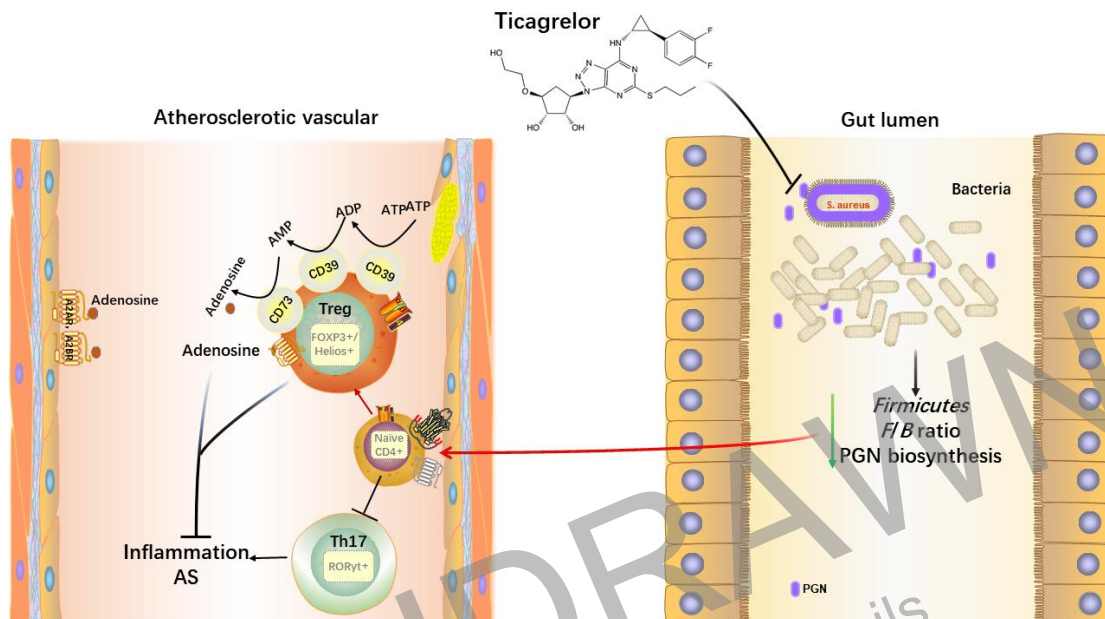

53

#### 54 **Graphic abstract**

55 Ticagrelor acts on intestinal bacteria after oral administration, reducing several  
56 pathogenic Gram-positive ( $G^+$ ) bacteria at phyla *Firmicutes* and the  
57 *Firmicutes/Bacteroidetes* (*F/B*) Ratio, thus decreasing the gut peptidoglycan (PGN)  
58 synthesis. The reduction of the above pathogenic factors causes the polarization of  
59 peripheral T lymphocytes toward Treg cells. The elevated Treg cells are accompanied  
60 by an increased expression of CD39/CD73 on Tregs, which hydrolyze the extracellular  
61 ATP generated from damaged endothelial cells into adenosine (ADO) with anti-  
62 inflammatory properties and ultimately inhibited the inflammation of atherosclerosis  
63 (AS).

64

#### 65 **Introduction**

66 Based on numerous studies, atherosclerosis (AS) has now been considered chronic  
67 inflammation, various stimuli can trigger and sustain the inflammation. As one such  
68 stimulus, chronic infection shared the common pathophysiological milieu of chronic  
69 inflammation<sup>1</sup>. A distant or direct infection of vessel wall cells has been thought to be  
70 the cause or promoter of atherosclerotic plaques with the supports by finding the  
71 bacteria DNA in the plaques<sup>2,3</sup>. Actually, since the middle of the 1990s, bacterial or  
72 viral infections have been considered to involve in AS<sup>4</sup>, it is increasingly believed that

73 gut flora, as comprises a treasure trove of immunomodulatory bacteria, has a cross-link  
74 to AS risk<sup>5</sup>. Numerous studies indicated that bacteria-derived metabolites like short-  
75 chain fatty acids (SCFAs)<sup>6,7</sup>, bile acids (BAs)<sup>8,9</sup>, and the high-profile Trimethylamine  
76 N-Oxide (TMAO)<sup>10</sup>, regulated the risk of CVD. In addition to these metabolites,  
77 lipopolysaccharide (LPS) and peptidoglycan (PGN), known as the main components of  
78 the bacterial cell wall, can be recognized by the innate and adaptive immune system to  
79 reinforce the CVD pathogenesis potentially<sup>5</sup>. Unlike LPS restrict to gram-negative (G<sup>-</sup>)  
80 bacteria, PGN is present in both G<sup>-</sup> and gram-positive (G<sup>+</sup>) bacteria, while is  
81 predominant in G<sup>+</sup> bacteria. A study enrolled 13 healthy individuals and 12 patients  
82 with symptomatic AS using metagenomes revealed that genes encoding PGN synthesis  
83 were enriched in patients' gut metagenomes<sup>11</sup>. In fact, two decades ago, PGN was found  
84 to gain access to atherosclerotic plaques and associated with the occurrence of a  
85 vulnerable plaque phenotype as a proinflammatory bacterial antigen<sup>12</sup>. Furthermore, a  
86 review recently highlighted the role of PGN as a determinative of brain inflammation<sup>13</sup>.  
87 All these facts indicated that gut PGN exerts a pro-inflammation profile in chronic  
88 inflammatory diseases, including AS. These collective findings have led to the idea that  
89 if the gut PGN biosynthesis pathway has been inhibited, can the atherosclerotic and  
90 related inflammation be ameliorated?

91 Adaptive immunity has a major impact on AS, with pro- and anti-atherosclerotic  
92 effects exerted by different subpopulations of T cells<sup>14</sup>. Regulatory T-cells (Tregs) are  
93 a subset of CD4<sup>+</sup> T cells with various immunosuppressive and anti-inflammatory  
94 functions<sup>15</sup>. The transcription factors Foxp3 and Helios are the master regulators of  
95 Tregs immunosuppressive functions<sup>16,17</sup>. It is well documented that the frequency of  
96 Tregs was reduced in the peripheral circulation of patients with carotid artery plaques<sup>18</sup>.  
97 Similarly, the number of Tregs was low in all stages of human atherosclerotic lesions,  
98 with measurements in surgical or biopsy samples<sup>19</sup>. It is well accepted that secretion of  
99 IL-10 by Tregs is important for the suppression, particularly in regulating inflammation  
100 against pathogens or foreign particles<sup>20</sup>. IL-10 has been found to play a role in  
101 prevention of AS and promotion of a stable plaque phenotype in *ApoE*<sup>-/-</sup> mice<sup>21</sup>. In

102 addition of IL-10, the mechanism of T cell on the suppression of inflammation should  
103 partially due to ectoenzymes CD39 (ENTPD1, ectonucleoside triphosphate  
104 diphosphohydrolase-1) and CD73 (NT5E, ecto-5'-nucleotidases) highly expressed on  
105 Tregs that can hydrolyze extracellular ATP generated from damaged vessel walls to  
106 adenosine (ADO), subsequently suppress effector T cells by binding to its receptor  
107 ADORA2A<sup>22</sup>. Another subset of CD4<sup>+</sup> T cells-T helpers 17 (Th17) mainly produce a  
108 strong pro-inflammatory cytokine IL-17A and have been observed in atherosclerotic  
109 plaques both in humans and animals<sup>23,24</sup>. The expression of transcription factor nuclear  
110 receptor ROR $\gamma$ t characterizes the Th17 cells. It is controversial of the role of IL-17A in  
111 AS, with some study suggesting that IL-17A is pro-atherogenic or athero-protective<sup>24,25</sup>,  
112 and a further study suggesting that IL-17A has no effect on AS<sup>26</sup>.

113 Dual antiplatelet therapy (DAPT), consisting of aspirin and a P2Y<sub>12</sub> inhibitor,  
114 ticagrelor or clopidogrel, is essential for the prevention and treatment of recurrent  
115 thrombotic events in patients with ACS or MI<sup>27</sup>. As a new P2Y<sub>12</sub> inhibitor, ticagrelor  
116 can bind to its receptor P2Y<sub>12</sub> reversibly to conduct effect without liver enzyme  
117 metabolism. Notably, a handful of clinical trials have established the superiority of  
118 ticagrelor against ACS, including the study that ticagrelor could significantly reduce  
119 the major adverse cardiovascular events (MACE) as compared to clopidogrel in patients  
120 with ACS<sup>28</sup> and provided ongoing benefits if continued long term<sup>29</sup>. Based on a current  
121 meta-analysis, ticagrelor could significantly reduce recurrent myocardial infarction<sup>30</sup>.  
122 Furthermore, a *post hoc* analysis indicated that ticagrelor could lower the mortality  
123 following pulmonary adverse events and sepsis compared to clopidogrel in the  
124 PLATelet inhibition and patient outcomes (PLATO) trial<sup>31</sup>. Evidence continued to  
125 mount that, ticagrelor exerted the potential of improving lung function in inpatients  
126 with pneumonia<sup>32</sup>. Taken together, these observations indicated the inevitable role of  
127 ticagrelor in reducing the incidence of infection-related disease while functioning its  
128 antiplatelet profile. Herein, scientists performed a study *in vivo* and *in vitro* that  
129 uncovered ticagrelor and its major metabolite AR-C124910 had antibacterial activity

130 against all G<sup>+</sup> strains tested and was inefficient against G<sup>-</sup> strains even in a higher  
131 concentration<sup>33</sup>.

132 Despite the studies above demonstrated the anti-bacteria signature of ticagrelor *in*  
133 *vivo* and *in vitro*, the impact of this first-line clinical medication on host gut microbiome  
134 has not been experimentally verified, where the constant dialog between gut  
135 microbiome and immune system take place. Herein, the driving concept of this study is  
136 to explore the athero-protective effect of ticagrelor in improving the immuno-  
137 inflammation via modifying the gut dysbiosis both in humans and experimental mice.  
138 Considering the privilege of its anti-bacterial characteristic, and the given close  
139 relationship of microbiota-immune interactions during the inflammation<sup>34,35</sup>, we  
140 therefore hypothesized that ticagrelor may regulate the gut microbiota, in particular,  
141 reduce the synthesis of PGN in gut, thus potentiate anti-inflammatory property via  
142 regulating the immune system of Treg/Th17 axis. To explore the hypothesis, we  
143 attempted to comprehensively profile the composition and function of the gut  
144 microbiota by 16S rRNA sequencing and metagenomes in unstable angina pectoris  
145 (UAP) patients with the intervention of ticagrelor plus aspirin or clopidogrel plus  
146 aspirin as antiplatelet therapies, the inflammation and adaptive immunity related  
147 regulators Tregs, CD39/CD73 Tregs and Th17 cells have been detected simultaneously.  
148 To substantiate the hypothesis, mice experiment was conducted parallely to exclude  
149 the interference factors in humans. Finally, the intervention with ticagrelor after  
150 depletion of the gut microbiome by antibiotics in mice was elicited to confirm whether  
151 the microbiota plays an indispensable role in immuno-inflammatory regulation by  
152 ticagrelor.

153

## 154 **Results**

### 155 **Characteristics of the study population**

156 From July 12 to December 25, 2021, a total of 103 participants of UAP patients were  
157 screened. 75 patients were enrolled, with 39 assigned to the ticagrelor-aspirin (TA)  
158 group and 36 allocated to the clopidogrel-aspirin (CA) group, in parallel with matched



159 ages, gender, and BMI. Finally, 11 patients in the TA group and 10 patients in the CA  
160 group donated their fecal and blood samples on admission and one-month follow-up in  
161 the study. The clinical characteristics and concomitant medications use of the 21  
162 patients were summarized in **Table 1**. There was no significant difference of previous  
163 and medications history, nor of the laboratory variables. All subjects in two groups  
164 underwent percutaneous coronary intervention (PCI) for the treatment of vessel  
165 narrowing and occlusion.

166  
167 **TA decreased the PGN and *S. aureus* infection biosynthesis pathways.** We  
168 performed a detailed comparison of gut microbial profiles using 16S rRNA gene  
169 sequencing and metabolomics in the fecal samples. The Shannon index at phylum level  
170 in TA group revealed a tendency toward alpha diversity compared with CA group  
171 ( $P=0.054$ , **Figure 1a**), in terms of  $\beta$  diversity, there was no distinct features between  
172 the two groups at the phylum level (**Figure 1b**). The relative abundance of phyla  
173 *Firmicutes* was visibly lower in the TA group than CA group ( $P=0.06$ , **Figure 1c**), but  
174 there were no differences in phyla *Bacteroidetes* or *Firmicutes* / *Bacteroidetes* (F/B)  
175 ratio (**Figure 1c**). Next, we used gut metagenomics to explore the functional pathways  
176 that the two different medications may influence. Surprisingly, we found the PGN  
177 biosynthesis pathway as the highest proportion of the whole functional pathways was  
178 lower in the TA group (the first red rectangle, **Figure 1d**). PGN biosynthesis contributed  
179 to *S. aureus* proliferation, which was also limited under TA treatment (The second red  
180 rectangle, **Figure 1d**). The KEGG map of PGN biosynthesis was generated and  
181 displayed associated with the *S. aureus* after two different treatments (**Figure 1e**).  
182 Strikingly, we found two PGN biosynthetic enzymes 3.4.6.14 and 1.3.1.98, especially  
183 the most predominant 3.4.6.14, were less enriched in the gut metagenomes under TA  
184 treatment (**Figure 1f**). The baseline of the two pathways and enzymes had no significant  
185 differences between the two groups (**Figures 2Sa-d**). Our data collectively suggested  
186 that ticagrelor played a potential role in regulating gut microbial dysbiosis in AS.

187

188 **Alterations of gut microbiota in patients with TA correlated with increased Tregs.**

189 Plenty of clinical and animal experiments indicate that AS is an inflammatory disease  
190 which is involved in the onset and progression of the disease. Accumulating evidence  
191 solidly demonstrate that microbial dysbiosis notably affects the inflammatory state  
192 in AS<sup>36</sup> and T cells play a pivotal role in cross-linking of the inflammation and dysbiosis  
193 of intestinal flora in AS<sup>34</sup>. Therefore, we hypothesized that the alteration of gut  
194 microbiota in AS patients with the two different antiplatelet therapy at least partially  
195 affected the adaptive immune system through regulating Treg/Th17 balance and  
196 subsequent inflammation indicators in peripheral circulation. We assessed the  
197 mentioned immune cells by flow cytometry and observed an increased frequency of  
198 Foxp3<sup>+</sup> Tregs and Foxp3<sup>+</sup>Helios<sup>+</sup> Tregs in the PBMC after one-month TA treatment  
199 (**Figure 2a, b, e, f**). Helios<sup>+</sup> Tregs was increased in TA group compared to the baseline,  
200 while in the CA group there was nearly significant difference from baseline ( $P=0.07$ )  
201 or TA group ( $P=0.06$ ) (**Figure 2c, d**). There was also a significant reduction of  
202 IL17A<sup>+</sup>CD4<sup>+</sup> T helper cells in TA group and a visible reduction in the CA group from  
203 the baseline ( $P=0.054$ ), nevertheless, there was no significant difference between two  
204 treated groups (**Figure 2g, h**). As the nuclear transcription factor of Th17, the  
205 expression of ROR $\gamma$ t was measured, but no difference was found between pre or after  
206 treatment for each medication compared to baseline, as well as between TA and CA  
207 (**Figure 2i, j**). Meanwhile, qPCR was used to investigate the mRNA levels of *Foxp3*,  
208 *Helios*, *RORC*, together with the inflammation cytokines *IL-17A*, *IL-10*, *TNF- $\alpha$*  in  
209 PBMC, the results indicated that neither treatment significantly modified the *Helios* or  
210 *RORC* expression from baseline or between treated groups (**Figure S4a, b**). The  
211 expression of *Foxp3* was elevated in TA group from baseline but not differed from CA  
212 group (**Figure S4c**). The mRNA levels of *IL-17A*, *IL-10*, *TNF- $\alpha$*  were consistently  
213 decreased in two treated groups from baseline, but there was no significant difference  
214 between the treated groups except *TNF- $\alpha$* . (**Figure S4d, e, f**). Finally, the plasma levels  
215 of IL-10 and IL-17A were detected by ELISA. Unfortunately, the concentration of IL-  
216 10 was not affected in two treatments from baseline nor between TA and CA (**Figure**



217 **S4g**). Either use of TA or CA could decrease the IL-17A level, but there still showed  
218 no significant difference between the parallel treatments (**Figure S4h**). These findings  
219 indicated that TA exerted the anti-inflammatory profile by up-regulating Tregs, but  
220 irrelevant to the Th17 cells and the production of IL-10 or IL-17A.

221

#### 222 **CD39-CD73-adenosine signaling is essential for TA mediated anti-inflammation.**

223 CD39-CD73 expressed on Tregs played a component role in immunosuppression, that  
224 can hydrolyze the extracellular ATP (eATP) released by dying or damaged cells into  
225 ADO<sup>37</sup>, and it functions as anti-inflammation in many impaired vessels including the  
226 atherosclerotic vessels. As illustrated in our previous findings, we next tried to detect  
227 the expression of CD39-CD73 on Tregs by flow cytometry. Our results revealed that  
228 CD39<sup>+</sup> Tregs could be elevated both in the TA and CA groups, while TA exerted better  
229 effect than CA (**Figure 3a, b**). A significant elevation of CD73<sup>+</sup> Tregs was observed in  
230 TA but not in CA from the baseline, but no superiority was seen between TA and CA  
231 ( $P=0.06$ ) (**Figure 3c, d**). Because of fast degradation of ADO within seconds, we tested  
232 the mRNA levels of ADO receptors including *ADORA2A*, *ADORA2B* in PBMC. The  
233 outcome showed that *ADORA2A* and *ADORA2B* gene expression could be increased in  
234 TA compared to pretreatment. In contrast, we didn't see any significant changes of  
235 *ADORA2A* and *ADORA2B* gene expression in CA treatment compared to the baseline.  
236 When it came to compare the two genes between CA and TA, we could visibly see a  
237 higher expression in TA group but without statistically significance, the  $P$  values were  
238 0.051 and 0.08 respectively (**Figure 3e, f**). These observations implied that CD39 and  
239 CD73 expressed on Tregs could influence peripheral inflammation, further  
240 emphasizing the therapeutic potential of ticagrelor targeting these molecules in AS.

241

#### 242 **TA might exert optimal synergistic effects on anti-atherosclerosis profile in *ApoE*<sup>-/-</sup>**

243 **mice**. To investigate the effects of different antiplatelet medicine alone or  
244 combinations, which mimic the clinical applications, *ApoE*<sup>-/-</sup> mice were treated by  
245 Ticagrelor (Tica), Ticagrelor+Aspirin (TA), Clopidogrel (Clop), Clopidogrel+Aspirin

246 (CA), Aspirin (Asp) and vehicle as control (Model) respectively. As the basic indicators,  
247 body weight, total bile acid, and lipid profiles exerted no statistical differences among  
248 the diverse groups (**Figure S4a-g**). Oil Red O staining of the atherosclerotic areas both  
249 in whole aorta and aorta sinus presented that compared to model, atherosclerotic lesion  
250 formation was markedly decreased in Tica and TA treated. Notably, TA exhibited better  
251 plaque burden attenuation than the other groups (**Figure 4b-e, h**). Any single use of  
252 Tica, Clop, Asp or combinations TA and CA could elevate the collagen deposition  
253 (**Figure 4f, h**), suggesting that the medications promoted the stability of atherosclerotic  
254 plaques. Collectively, these pathological detections indicated that *ApoE*<sup>-/-</sup> mice received  
255 either Tica, Clop, Asp alone or combination TA, CA, they all could ameliorate  
256 atherosclerotic plaques, of particular, TA seemed to exert optimal syneristic effects on  
257 athero-protective property.

258  
259 **TA modulated the gut dysbiosis in *ApoE*<sup>-/-</sup> mice to meet an analogous character**  
260 **presented in human, confirmed its mechanism of TA in decreasing the gut PGN**  
261 **biosynthesis and *S. aureus* infection pathways.** PCR-free library was constructed  
262 based on Illumina Nova sequencing platform sequencing, and then Paired-End  
263 sequencing was performed. By splicing Reads, an average of 97,264 tags were  
264 measured per sample, and an average of 90,830 valid data were obtained after quality  
265 control. The rarefaction curves of all the samples displayed the sequence number nearly  
266 to 50000, indicating the sequencing depth was adequate (**Figure S5a**). In terms of alpha  
267 diversity, we observed significant differences between TA vs Model ( $P<0.05$ ), TA vs  
268 Asp ( $P<0.05$ ), and TA vs CA ( $P<0.05$ ) (**Figure 5a**) by Shannon's index. To further  
269 evaluate the overall gut microbiota community,  $\beta$  diversity of PCA based on the  
270 weighted UniFrac distances was conducted (**Figure 5b**), single Tica or Clop exhibited  
271 different compared to Model ( $P<0.01$ ) and Asp ( $P<0.01$ ), while the combination TA  
272 showed no significant differences from other groups. According to the species  
273 annotation results, the maximum value sorting method was used to select the top 5

274 species with the largest abundance in each group with generating a Sankey diagram.  
275 The Sankey diagram can intuitively view the relative abundance and distribution at the  
276 phylum level (**Figure 5c**). We could obviously conclude that in Tica and TA groups, the  
277 most predominant taxa were *Bacteroidota* and *Verrucomicrobiota*, the proportion of  
278 *Firmicutes* came to the third place of the whole phylum level (**Figure 5c**). Clop could  
279 really upregulate the *Firmicutes* population, while CA or Asp showed no obvious  
280 changes compared to Model by visual inspection (**Figure 5c**). To further explore the  
281 relative proportion of dominant taxa at the phylum and genus levels, we conducted  
282 Matastat analyze in groups (**Figure 5d, e**). As expected, *Firmicutes* were reduced  
283 remarkably in Tica and TA group compared to other groups (**Figure 5d**), which was  
284 consistent with our previous clinical findings (**Figure 1b**). Notably, the phyla  
285 *Desulfobacterota* in CA treated group exhibited higher proportion compared to Model  
286 or to other treatments ( $P < 0.01$ , **Figure 5d**), which was reported as opportunistic  
287 pathogens in obese mice<sup>38</sup>. The *F/B* ratio decreased dramatically in Tica and TA  
288 compared to model and Clop related treatments, while Clop and CA changed the *F/B*  
289 ratio very slightly and had no significant difference compared to Model (**Figure 5f**). It  
290 is reported that *Firmicutes* and *F/B* ratio were positively related to AS progression<sup>39</sup>. At  
291 genus level, we noted that, Tica and TA could sharply reduce the *Bilophila*, *Blautia*,  
292 *Clostridium\_sensu\_stricto\_1*, and *[Eubacterium]\_fissicatena\_group* compared to  
293 Model, Clop or CA treatments (**Figure 5e**), all these species were catalog of phylum  
294 *Firmicutes* (**Figure S5d**) and were considered pathogenic bacteria except *Blautia*.  
295 Instead, *Parasutterella*, *Muribaculum* were significantly elevated in TA, while  
296 *Faecalibaculum* and *Roseburia* both of them are phyla *Firmicutes*, were incredibly  
297 increased in Tica group (**Figure S6f, g**). In addition, the genera *Akkermasia* contributed  
298 to phyla *Verrucomicrobiota* increase in Tica group (**Figure 5e, S5e**). Finally, the  
299 functional pathways were predicted by Tax4fun. Encouragingly, the gut PGN  
300 biosynthesis and *S. aureus* infection pathways were obviously limited by TA treatment  
301 (**Figure 5g, h**), which confirmed our previous findings in human study.

302

303 **Treg/Th17 axis and CD39-CD73 signaling are essential for Tica and TA-mediate**  
304 **anti-inflammation effect in *ApoE*<sup>-/-</sup> mice.** In view of the effectiveness of Tica and TA  
305 on atherosclerotic plaque burden amelioration and the gut microbiota regulation in mice  
306 mentioned above, we further investigated the Treg/Th17 axis, due to abundant studies  
307 indicated that PGN and *S. aureus* had close relationship with T cell differentiation and  
308 the inflammation<sup>13,40-42</sup>. Hence, we investigated the Treg/Th17 cells proportions in  
309 blood and inflammation indicators in plasma. Single Foxp3<sup>+</sup>Treg, or Helios<sup>+</sup>Treg, as  
310 well as both Foxp3<sup>+</sup> Helios<sup>+</sup>Treg cells were obviously elevated in Tica and TA  
311 compared to model and other treatments, while we didn't see such effects in Clop and  
312 CA treatments (**Figure 6a-f**). Unlike our human study, in mice model the Th17 cells  
313 were remarkably reduced in all treated groups compared to Model, meanwhile TA  
314 exhibited most conspicuous effect (**Figure 6g, h**). To assess the inflammatory indicators  
315 in diverse groups, Cytometric Beads Array (CBA) was used to detect the pro-  
316 inflammatory IFN- $\gamma$ , IL-1 $\beta$ , IL-6, MCP-1, TNF- $\alpha$ , IL-17A and anti-inflammatory IL-  
317 10. Both P2Y12 inhibitors had a marked effect on inflammatory indicators response by  
318 reducing pro-inflammatory cytokines compared to Model, and there was no significant  
319 difference between them (**Figure 6i**). TA showed distinct feature in lowering the IL-  
320 17A level, while in increasing IL-10, Tica did better compared to Model and other  
321 groups (**Figure 6i**). To clarify the relationship of CD39, CD73 and ADO, we detected  
322 the co-expressions of CD39, CD73 and ADO receptors with immunofluorescence  
323 staining in aorta sinus. Both the areas of CD39<sup>+</sup>ADORA2A<sup>+</sup> and CD73<sup>+</sup>ADORA2A<sup>+</sup>  
324 were increased in all treatments, while Tica and TA exhibited excellent effects than  
325 other medicine (**Figure 7a-d**). We previously mentioned that eATP can damage vessel  
326 wall, which can be conversed to ADO by CD39 and CD73 step by step. Hence, we  
327 tested the plasma ATP concentration to confirm whether higher expression of CD39 and  
328 CD73 correlated with lower ATP. Notably, in Tica and TA groups, the concentration of  
329 ATP could be reduced obviously compared to other groups (**Figure 7e**). Surprisingly,  
330 CA reduced the ATP concentration as well, the explanation maybe, besides CD73 and  
331 CD39, ADO can also be generated by alkaline through phosphatases sequential removal

332 of phosphate groups from ATP<sup>43</sup>. Correlation analysis indicated that both elevated  
333 expressions of CD39<sup>+</sup>ADORA2A<sup>+</sup> and CD73<sup>+</sup>ADORA2A<sup>+</sup> had a negative correlation  
334 with plasma ATP concentration (**Figure 7f, g**), thus revealing that the anti-inflammatory  
335 ADO may generate from the hydrolysis of ATP by CD39 and CD73.

336

337 **Microbiome depletion terminated the athero-protective profile by ticagrelor.** To  
338 explore the association between the gut microbiome and athero-protective profile by  
339 ticagrelor in *ApoE*<sup>-/-</sup> mice, we treated 8-week-old mice with an antibiotic cocktail (ABX)  
340 for 5 weeks to establish an antibiotic-induced microbiome depletion condition.  
341 Depletion of microbiota with ABX was confirmed by qPCR using universal 16S rRNA  
342 primers. After 5 weeks of ABX, mice were treated with ticagrelor (TABX) or vehicle  
343 (MABX) as control respectively. The plaque burden of the whole aorta and aorta sinus  
344 in TABX did not differ from those of control mice (**Figure 8b-e**). Consistent with the  
345 atherosclerotic plaques, significant difference of the frequencies of Foxp3<sup>+</sup>Helios<sup>+</sup>  
346 Tregs, IL17A<sup>+</sup>CD4<sup>+</sup> T helper cells and inflammatory cytokines were not observed in  
347 ABX induced mice in absence of ticagrelor or not (**Figure 8f-j**). These findings  
348 strengthened our hypothesis that ticagrelor exerted as an immuno-inflammatory  
349 modulator in the context of AS in a microbiome-dependent manner.

350

351

## 352 **Discussion**

353 The immune system is a complex network composed of innate and adaptive  
354 components with an excellent capacity to adapt and respond to highly diverse  
355 challenges. Collectively, this network acts as a rigid regulator of host homeostasis in  
356 the context of microbial and environmental encounters. Studies have uncovered the  
357 critical role of the microbiota in promoting and balancing all aspects of the immune  
358 system<sup>44,45</sup>. Growing evidence indicate that microbial alterations have been shown to  
359 regulate the inflammatory response and adaptive immune system, which is required for  
360 host defense against intestinal infections<sup>46-48</sup>. Among the adaptive immune system,

361 Tregs and Th17 cells play a pivotal role in sustaining and restoring homeostasis in  
362 diseases<sup>49,50</sup>, including cardiovascular disease<sup>51</sup>.

363 In this work, we have shown both clinical and murine measures to explore the gut  
364 microbiome changes regulated by the first-line clinical platelet-modifying medicine,  
365 the P2Y12 inhibitors, ticagrelor and clopidogrel. Our results suggested that ticagrelor  
366 or ticagrelor combined aspirin function as bacterial growth modulators in the gut and  
367 exerted their effectiveness in reducing the phylum *Firmicutes* and F/B ratio, which was  
368 considered to be harmful to atherosclerosis<sup>39</sup>, thus decreasing the gut PGN and *S.*  
369 *aureus* infection biosynthesis to prevent the development of AS. Our data indicated that  
370 the observed reduction of gut PGN biosynthesis resulted from altered enzymes that  
371 contributed to the pathway of PGN biosynthesis by the remodeled gut microbiota,  
372 which subsequently, led to the downregulation of *S. aureus* infection biosynthesis. In  
373 addition, ticagrelor and ticagrelor-aspirin in regulating gut flora suppressed the  
374 production of pro-inflammatory cytokines, increased the relative population of the  
375 circulatory of Tregs, including Foxp3<sup>+</sup>Treg, Helios<sup>+</sup>Treg, Foxp3<sup>+</sup>Helios<sup>+</sup>Treg immune  
376 cells, and the elevated production of CD39/CD73 expressed on Treg cells which can  
377 hydrolyze the extracellular ATP (eATP) generated from damaged endothelial cell to  
378 ADO contributed to the anti-inflammatory effect as well. However, there was no  
379 statistical difference in Th17 cells under the two different treatments, which is in line  
380 with the findings of the controversial role of Th17 in AS<sup>9,24,52,53</sup>

381 Indeed, since the *post hoc* analysis of the PLATO trial indicated that ticagrelor  
382 was superior to clopidogrel in infectious-related diseases, studies focused on ticagrelor  
383 in reducing the *S. aureus* infection were popped out<sup>54-57</sup>. Our findings for the first time  
384 provided evidence for gut microbiome-dependent anti-inflammation properties of  
385 ticagrelor, which indicated that ticagrelor could affect the immuno-inflammation  
386 system in addition to its well-known antiplatelet effects. Phyla *Firmicutes* and  
387 *Bacteroides* are the most predominant taxa in the human and murine gut, and it is  
388 widely accepted that decrease of *Bacteroides*, increase of *Firmicutes* and the ratio of  
389 *Firmicute* to *Bacteroides* (F/B) contributed to promoting atherosclerosis<sup>39</sup>. Most of the



390 G<sup>+</sup> bacteria contribute to the *Firmicutes*. Surprisingly, we found *Firmicutes* were  
391 decreased after ticagrelor-aspirin intervention compared to clopidogrel-aspirin. In the  
392 mice study, we found the genera *Bilophyla*, *Clostridium\_sensu\_stricto\_1* and  
393 [*Eubacterium*]*\_fissicatena\_group* reduced remarkably after the treatment of ticagrelor  
394 or ticagrelor-aspirin, these species generated from Phyla *Firmicutes*, were considered  
395 pathogen-related bacteria as well<sup>58-61</sup>. *Blautia*, derived from phyla *Firmicutes*, with  
396 potential probiotic property<sup>62</sup>, was sharply reduced with the treatment of ticagrelor or  
397 ticagrelor-aspirin, while enriched in clopidogrel-aspirin or aspirin. These intricate  
398 results led us to determine the production of SCFAs, for one of the SCFAs, the butyric  
399 acid generated from most of the phyla *Firmicutes*. Surprisingly, all of the SCFAs  
400 increased slightly in ticagrelor, or ticagrelor-aspirin treated groups (**Data available**),  
401 together with the genera *Faecalibaculum* and *Roseburia* contributed to phyla  
402 *Firmicutes* incredibly enriched in ticagrelor treated group, these data reinforced the  
403 concept that ticagrelor functions as modifying the microbiome even though it targets  
404 the phylum *Firmicutes*. Meanwhile, the metagenome analysis uncovered that the  
405 bacterial PGN biosynthesis was limited by ticagrelor. PGN, a well-known component  
406 of the bacterial cell wall, is especially prominent in G<sup>+</sup> bacteria (up to 70 layers), can  
407 exert robust inflammatory effects<sup>63</sup>, including T cell polarizing cytokines, which are  
408 required for T helper cells activation<sup>64</sup>. In our study, we found a decreased biosynthesis  
409 of PGN under ticagrelor-aspirin treated accompanied with increased production of  
410 peripheric Tregs, while mice were under antibiotic-induced microbiome depletion, the  
411 proportion of Tregs kept at the same level in presence or absence of ticagrelor, which  
412 validated the hypothesis of microbiota-mediated anti-inflammation and immune  
413 regulation by ticagrelor.

414 Tregs mediated suppression functions as negative regulation of immune-mediated  
415 inflammation and features prominently in acute and chronic infections, cancer, and  
416 metabolic inflammation<sup>65</sup>. *Foxp3*, the transcription factor that specifies the Treg cell  
417 lineage, essential for Treg cell differentiation and suppressor function and defines the  
418 Treg cell lineage<sup>65,66</sup>. *Helios* (*IKZF2*) belongs to the *Ikaros* transcription factor family,

419 is found critically required to maintain a stable Treg cell phenotype in the inflammatory  
420 diseases in recent years<sup>67</sup>. To be noted, studies indicated *Helios* enhances regulatory T  
421 cell function in cooperation with *Foxp3* in patients with rheumatoid arthritis<sup>68</sup>. Our  
422 results demonstrated that the treatment with ticagrelor could obviously up-regulate the  
423 expression of Foxp3<sup>+</sup> Tregs, Helios<sup>+</sup> Tregs, and Foxp3<sup>+</sup>Helios<sup>+</sup> Tregs, which displayed  
424 suppressor function of adaptive immune system in AS. By contrast, a previous study  
425 which enrolled volunteers to determine the two main P2Y12 inhibitors response to  
426 systemic inflammation by injection of *Escherichia coli* endotoxin, the result of the  
427 study indicated that ticagrelor could obviously increase the anti-inflammatory cytokine  
428 IL-10, however, we didn't see any perturbation of IL-10 level under established groups.  
429 Discrepancies between our findings and this previous report may be explained as a  
430 cytokine related to Tregs, IL-10 is produced by other type of cells as well, such as  
431 macrophage, mast cell, eosinophils, neutrophils, B cells, natural killer cells and  
432 dendritic cells, resulting the dual function of anti- and pro-inflammation<sup>69</sup>. Additional  
433 explanation of stable level of IL-10 after using the P2Y12 inhibitors may on account of  
434 little is known about the interplay of IL-10 and other pro-/anti-inflammatory cytokines  
435 in the pathogenesis of AS. In recent years, Th17 cells, a subset of CD4<sup>+</sup> T cells, were  
436 found to be pro- and anti-atherogenic effects<sup>70</sup>. In our study, single use of P2Y12  
437 inhibitors or they combined with aspirin respectively could reduce the production IL-  
438 17A compared to baseline, which in line with the study that ticagrelor and clopidogrel  
439 could obviously reduce the development of Th17 cells in EAE, an experimental  
440 multiple sclerosis model<sup>71</sup>. But we found there was no superiority of ticagrelor to  
441 clopidogrel. IL-17A is the cytokine that produced by Th17 cells, but  $\gamma\delta$  T cells represent  
442 another source of IL-17 in intestinal. Our unshown data of mice exhibited no difference  
443 population of  $\gamma\delta$  T cells in the diverse groups. Furthermore, IL-17 family members  
444 contain IL-17A, IL-17B, IL-17C, IL-17D, IL-17E, IL-17F, the crosslink of these IL-17  
445 family members in AS has not yet been studied. It seemed like that in our study, Tregs  
446 and Th17, partners of trading off and taking turns, left elevated Tregs to display the  
447 suppressor function generated by ticagrelor via a microbiota-dependent manner.

448 eATP as a kind of danger-associated molecular patterns (DAMPs), binds to  
449 purinergic receptors to trigger signaling cascades to induce an inflammatory response<sup>72</sup>.  
450 A mice model clarified the fact eATP increased released in AS and enhanced AS via  
451 binding to its receptor P2Y2 through leukocyte and monocyte recruitment<sup>73</sup>. CD39,  
452 together with CD73, both ectoenzymes that hydrolyze eATP to pericellular ADO step  
453 by step. Evidence elucidated the absence of CD39 and CD73 exacerbate the progression  
454 of AS<sup>37,74</sup>. Extracellular ADO exerts its biological effects through the engagement of 4  
455 distinct subtypes of ADO receptors, namely, ADORA1, ADORA2A, ADORA2B and  
456 ADORA3 receptors. Immunosuppressive activities of ADO are mainly mediated by  
457 Gs-coupled ADORA2A and ADORA2B receptors<sup>75</sup>. Researchers concluded that CD39  
458 and CD73 are surface markers of Tregs that impart a specific biochemical signature  
459 characterized by ADO generation that has functional relevance for cellular  
460 immunoregulation<sup>22</sup>. In the current study, we detected the ADO receptors, ADORA2A  
461 and ADORA2B as indirect markers of ADO due to the fast degradation of ADO within  
462 seconds by no effective means. Our data suggested that altered microbiota induced by  
463 ticagrelor or ticagrelor-aspirin activated the Tregs and their increased production of  
464 CD39 and CD73 might limit the systemic inflammation in AS.

465 In conclusion, ticagrelor or ticagrelor-aspirin mediated multiple alterations of  
466 composition and function in gut microbiota, ameliorated inflammation status, and  
467 uncovered a potential mechanism of CD39-CD73-Treg associated with better AS  
468 outcomes beyond the function as P2Y12 inhibitors. Our findings shed new light on the  
469 implication of the intestinal microbiota-immune system-cardiovascular axis in  
470 atherosclerotic development by the intervention of ticagrelor or ticagrelor-aspirin,  
471 specifying the indication of ticagrelor in infection related disease via modifying the gut  
472 microbiota.

473

## 474 **Materials and Methods**

### 475 **Study population**

476 A total of 103 patients with UAP were screened in, 11 of whom took Ticagrelor+Aspirin  
477 (TA) and 10 with Clopidogrel+Aspirin (CA). All patients should meet the inclusion  
478 criteria as follows: 1. Coronary atherosclerotic plaques confirmed by coronary  
479 computed tomography angiography (CCTA) or coronary angiography (CAG); 2. Age  
480 between 40-70 years old; 3. No previous history of antiplatelet therapy. Patients with:  
481 1. Infectious, genetic, autoimmunity-mediated, metabolic diseases; 2. Digestive  
482 disorders (inflammatory bowel disease, acute/chronic diarrhea, chronic constipation);  
483 3. Severe hepatic and renal insufficiency; 4. Chronic respiratory diseases (COPD,  
484 asthma, etc.); 5. Antibiotics treatment within the past 1 month with the course of  
485 treatment exceeding 3 days were excluded. The enrollment strategy was displayed in  
486 **Figure S1**. Peripheral venous blood and fecal samples were collected on admission and  
487 one-month follow-up for every enrolled patient. Plasma and PBMCs were isolated from  
488 each fresh blood sample, and PBMCs were prepared for the subsequent experiments of  
489 flow cytometry and mRNA extraction. The stool samples were collected and  
490 immediately stored at -80°C for further study. The study was conducted in accordance  
491 with the declaration of Helsinki. All subjects provided written, informed consents for  
492 the participation of the study. All blood and fecal samples were collected with ethics  
493 approval from the General Hospital of Ningxia Medical University (No. KYLL-2021-  
494 432). The study was registered at Chinese Clinical Trial Registry (Registration number  
495 ChiCTR2100051564).

#### 496 **Animals and Experimental design**

497 Seventy-two male *ApoE*<sup>-/-</sup> mice (C57BL/6J) and 10 male C57BL/6J mice were  
498 purchased at 5 weeks of age and were housed in under SFP conditions at 22°C with a  
499 12h light/dark cycle and free access to water and food. Up to 5 mice were allocated per  
500 cage and had three weeks of adaptation time with a chow diet before the experiment.  
501 Mice were fed with a Western diet containing 0.5% cholesterol together with different  
502 treatments of administration of Tica (Ticagrelor; Brilinta, 120mg/kg/day), Clop  
503 (Clopidogrel; Plavix, 48mg/kg/day), Asp (Aspirin; Bayer S.p.A, 67mg/kg/day) and the  
504 combination of TA (ticagrelor 120mg/kg/day+Aspirin 67mg/kg/day), CA (Clopidogrel

505 48mg/kg/day+Aspirin 67mg/kg/day) and vehicle as control (Model) respectively for 15  
506 weeks. Dosage of ticagrelor was known to provide comparable platelet inhibitory effect  
507 in mice<sup>76</sup>, and dosages of clopidogrel and aspirin were 0.42 and 0.56-fold to ticagrelor  
508 corresponding to the dosages used in humans<sup>77</sup>. For antibiotic-induced microbiome  
509 depletion, the mice were supplied antibiotics cocktail (ABX, consisting of ampicillin 1  
510 g/L, vancomycin 500 mg/L, neomycin 1 g/L, and metronidazole 1 g/L, all of them were  
511 bought from Sigma) to deplete gut commensal bacteria in their drinking water for 5  
512 weeks, and fresh ABX was replaced every other day. At the end of the study, animals  
513 were euthanized with 4% sodium pentobarbital and sacrificed for the subsequent study.  
514 This animal experiment has been approved by Laboratory Animal Ethical and Welfare  
515 Committee of Ningxia Medical University (No. 2020-078).

#### 516 **16S rRNA sequencing, processing, and analyzing of the gut microbiota**

517 Total microbial genomic DNA was extracted from fecal samples of humans and mice  
518 using the E.Z.N.A.<sup>®</sup> DNA Kit (Omega Bio-Tek, Norcross, GA, U.S.) according to the  
519 manufacturer's instructions. The quality and concentration of DNA were determined by  
520 1.0% agarose gel electrophoresis and a Nano Drop<sup>®</sup> ND-2000 spectrophotometer  
521 (Thermo Scientific Inc., USA) and kept at -80 °C prior to further use. The hypervariable  
522 region V3-V4 of the bacterial 16S rRNA gene was amplified with primer pairs 338F  
523 (5'-ACTCCTACGGGAGGCAGCAG-3') and 806R (5'-  
524 GGACTACHVGGGTWTCTAAT-3') by an ABI Gene Amp<sup>®</sup> 9700 PCR thermocycler  
525 (ABI, CA, USA). The PCR reaction mixture included 4 µL 5× Fast Pfu buffer, 2 µL 2.5  
526 mM dNTPs, 0.8 µL each primer (5 µM), 0.4 µL Fast Pfu polymerase, 10 ng of template  
527 DNA, and ddH<sub>2</sub>O to a final volume of 20 µL. All samples were amplified in triplicate.  
528 The PCR product was extracted from 2% agarose gel and purified using the AxyPrep  
529 DNA Gel Extraction Kit (Axygen Biosciences, Union City, CA, USA) according to  
530 manufacturer's instructions and quantified by Quantus<sup>™</sup> Fluorometer (Promega, USA).  
531 Purified amplicons were pooled in equimolar amounts and paired-end sequenced on an  
532 Illumina MiSeq PE300 platform (Illumina, San Diego, USA) according to the standard  
533 protocols. After demultiplexing, the resulting sequences were filtered with fastp for

534 quality control (0.19.6)<sup>78</sup> and merged with FLASH (v1.2.11)<sup>79</sup>. Then the high-quality  
535 sequences were denoised using DADA2<sup>80</sup> plugin in the Qiime2<sup>81</sup>(version 2020.2)  
536 pipeline with recommended parameters, which obtained single-nucleotide resolution  
537 based on error profiles within samples. DADA2 denoised sequences are usually called  
538 amplicon sequence variants (ASVs). To minimize the effects of sequencing depth on  
539 alpha and beta diversity measurement, the number of sequences from each sample was  
540 rarefied to more than 40,000, which still yielded an average good's coverage of 97.90%.  
541 Taxonomic assignment of ASVs was performed using the Naive Bayes consensus  
542 taxonomy classifier implemented in Qiime2 and the SILVA 16S rRNA database (v138).  
543 The metagenomic function was predicted by Tax4Fun<sup>82</sup> in mice experiment.

544 Bioinformatic analysis of the gut microbiota was carried out using the Majorbio  
545 Cloud platform (<https://cloud.majorbio.com>). Based on the ASVs information,  
546 rarefaction curves and alpha diversity indices including observed ASVs, Shannon index  
547 was calculated with Mothur v1.30.1. The similarity among the microbial communities  
548 in different samples was determined by PCA (Principal Component Analysis) based on  
549 Bray-curtis dissimilarity using Vegan v2.5-3 package in human data or by weighted  
550 unifrac in mice. The MetaStat analyzing was used to perform with the hypothesis  
551 testing on the species abundance data between groups in different levels and q-values  
552 were obtained by the correcting p-values to assess the significant differences between  
553 groups. *P* values of <0.05 were considered statistically significant.

#### 554 **Metagenomic analysis**

555 Total genomic DNA was extracted from human fecal samples using the E.Z.N.A.<sup>®</sup> DNA  
556 Kit (Omega Bio-tek, Norcross, GA, U.S.) as manufacturer's instructions. Concentration  
557 and purity of extracted DNA were determined with TBS-380 and NanoDrop2000,  
558 respectively. DNA extract quality was checked on 1% agarose gel. DNA extract was  
559 fragmented to an average size of about 400 bp using Covaris M220 (Gene Company  
560 Limited) for paired-end library construction, which was constructed using  
561 NEXTFLEX<sup>®</sup> Rapid DNA-Seq (Bioo Scientific, Austin, TX, USA). Paired-end  
562 sequencing was performed on Illumina NovaSeq (Illumina Inc., San Diego, CA, USA)



563 at Majorbio Bio-Pharm Technology Co., Ltd. using NovaSeq reagent kits according to  
564 the manufacturer's instructions ([www.illumina.com](http://www.illumina.com)).

565 The data were analyzed on the free online platform of Majorbio Cloud Platform  
566 ([www.majorbio.com](http://www.majorbio.com)). Briefly, the paired-end Illumina reads were trimmed of adaptors,  
567 and length < 50 bp or with a quality value < 20 or having N bases were considered low-  
568 quality reads and were removed by fastp<sup>78</sup> (<https://github.com/OpenGene/fastp>, version  
569 0.20.0). Reads were aligned to the human genome by BWA<sup>83</sup> ([http://bio-  
570 bwa.sourceforge.net](http://bio-bwa.sourceforge.net), version 0.7.9a) and any hit associated with the reads and their  
571 mated reads were removed. Metagenomics data were assembled using  
572 MEGAHIT<sup>84</sup> (<https://github.com/voutcn/megahit>, version 1.1.2), which makes use of  
573 succinct de Bruijn graphs. Contigs with a length  $\geq 300$  bp were selected as the final  
574 assembling results used for further annotation. The KEGG annotation was conducted  
575 using Diamond<sup>85</sup> (<http://www.diamondsearch.org/index.php>, version 0.8.35) and  
576 transformed to the Kyoto Encyclopedia of Genes and Genomes database  
577 (<http://www.genome.jp/keeg/>) with an e-value cutoff of  $1e^{-5}$ . Reads number relative was  
578 used to downstream analysis. Two-side Wilcoxon rank sum test was used to determine  
579 gene abundance significant difference between groups. *P* values of < 0.05 were  
580 considered statistically significant.

#### 581 **PBMC isolated from venous blood**

582 Peripheral blood mononuclear cells (PBMCs) were isolated from both human and mice.  
583 After 5 ml of whole blood with EDTA-coated tube were collected and centrifugated at  
584  $600\times g$  for 10 min, plasma was isolated and stored at  $-80^{\circ}\text{C}$  for further use. Then the  
585 PBS was added to the rest of the blood and gently mixed. Next, the mixture was softly  
586 underlayed on the Lymphocyte Separation Medium and centrifugated at  $600\times g$  for 25  
587 min at room temperature. The ratio of blood, PBS, and Lymphocyte Separation Medium  
588 was 1:1:1. PBMCs were harvested from the buffy coat layer and resuspended in media  
589 contained 10% DMSO and 90% fetal bovine serum (FBS) and stored in liquid nitrogen  
590 for downstream experiments.

#### 591 **Quantitative determination of mRNA expression**

592 Total RNA were extracted from the fresh isolated PBMC, protocol was mention above,  
593 and E.Z.N.A.<sup>®</sup> Blood RNA Kit (OMEGA, #R6834) was used according to the  
594 manufacturer's instructions. cDNA was synthesized to a total of 500ng RNA in a 20  $\mu$ L  
595 system using PrimeScript<sup>™</sup> RT Reagent kit (TAKARA, #RR036A). q-PCR were  
596 performed on anlytik jena (qTOWER 2.0) PCR machine using Perfect Start Green  
597 qPCR Super Mix (TransGen, #AQ601). The program was performed as follows: 94°C  
598 for 30 s, 94°C for 5 s and 60°C for 15 s, repeated for 40 cycles; 72°C for 15 s (melt  
599 curve). Gene expression was analyzed using SYBR Green Master mix and selected  
600 primers used in this study were listed in **Table S1**. The expression of target genes was  
601 normalized to the expression of  $\beta$ -*ACTIN*, and shown as fold change relative to the pre-  
602 treatment group based on the  $2^{-\Delta\Delta Ct}$  method.

### 603 **Flow cytometric analysis (FACS)**

604 PBMCs were quickly thawed at 37°C and cell suspensions were adjusted to a density  
605 of  $1 \times 10^6$  cells in 100  $\mu$ L of medium (RPMI 1640 with 10% FBS) and stimulated with  
606 Cell Stimulation Cocktail (plus protein transport inhibitors) (500 $\times$ ) (eBioscience<sup>™</sup>,  
607 #00-4975) for 4 h at 37°C for Th17 staining whilst Foxp3/Transcription Factor Staining  
608 Buffer Set (eBioscience, #00-5523) was used for transcription factor staining as  
609 manufacturer's instructions. Cells were stained with antibodies listed below for surface  
610 and intracellular markers (4°C, 30 min). CD4-APC-eFluor 780 (eBioscience<sup>™</sup>, #47-  
611 0048), CD39-PE-Cy7 (eBioscience<sup>™</sup>, #25-0399), CD73-FITC (eBioscience, #11-  
612 0739), Foxp3-PE (eBioscience<sup>™</sup>, #12-4776), Helios-eFluor 450 (eBioscience<sup>™</sup>, #48-  
613 9983), ROR $\gamma$ t-APC (eBioscience<sup>™</sup>, #17-6988), IL-17A-PE (eBioscience<sup>™</sup>, #25-  
614 7179), all these above were used for human study. In mice experiment, we used the  
615 antibodies as follow: CD4-FITC (eBioscience<sup>™</sup>, #11-0042), Foxp3-PE (eBioscience<sup>™</sup>,  
616 #12-5773), Helios-APC (eBioscience<sup>™</sup>, #17-9883), IL-17A-PC5.5 (eBioscience<sup>™</sup>,  
617 #11-7177). The fluorescent staining was performed after blocking the Fc receptor with  
618 the anti-CD16/CD32 antibody. FACS acquisition was performed with the cytometer  
619 Cytomics FC500 (Beckman Coulter). Finally, the Tregs and Th17 cells were analyzed  
620 by Beckman Cyto FLEX flow cytometer (Beckman Bioscience, United States).

621 **Measurement of cytokines in plasma**

622 LEGENDplex™ Mouse Inflammation Standard Cocktail (Biolegend, #740371) was  
623 used to measure the cytokines in plasma of the mice according to the manufacturer's  
624 instruction. Samples were diluted as 1:2, a total of 7 standards were used per cytokine  
625 to generate standard curve. Data were analyzed by LEGENDplex (version 8.0). For  
626 human IL-10 and IL-17A cytokines' measurement, we used commercially available  
627 ELISA kit, IL-10 (Boster, #EK0416) and IL-17A (Boster, #EK0430) following the  
628 manufacturer's instructions.

629 **Histological analysis and immunofluorescence staining**

630 Frozen aortic roots were cut in 5 µm-thick serial cryosections and stained with Oil-Red  
631 O, hematoxylin and eosin and Masson's trichrome respectively for the quantification of  
632 lesion size and collagen area. The whole aorta was isolated from carotid artery to iliac  
633 artery and was stained with Oil-Red O to access the lesion area in general.  
634 Atherosclerotic lesion of the whole aorta or aorta sinus staining above was observed  
635 using the microscope (Olympus, Japan). For immunofluorescence staining, 5 µm-thick  
636 sections of the frozen aortic roots were used to examine the expression of detected  
637 antibodies. Briefly, sections were covered 10% goat serum to block the nonspecific  
638 antigens at room temperature for 30 min. Then the sections were incubated with the  
639 primary antibodies of anti-rabbit CD39, anti-rabbit CD73, anti-mouse ADORA2A  
640 FITC (1:100, Santa Cruz, United States) overnight at 4°C. The next day, the slides were  
641 incubated with a suitable secondary antibody conjugated goat anti-rabbit IgG-HRP for  
642 1 h at room temperature. Finally, cell nuclei were mounted with DAPI for 10 minutes  
643 at room temperature. Images were captured with blinded manner of Leica DMI3000+  
644 DFC310FX fluorescence microscope (Leica, Germany). The positive areas in plaque  
645 were quantified by Image-Pro Plus 6.0.

646

647 **Statistics**

648 Graphpad Prism (Version 8) and SPSS 22.0 were used for all the data analysis and the  
649 value were expressed as the mean±SEM. The significant differences between groups

650 were calculated by unpaired Student's t test, or one-way ANOVA (Tukey's multiple  
651 comparison test). Normality and lognormality tests were carried out before the  
652 parametric analysis of Student's t test and one-way ANOVA. Welch's corrections were  
653 used when variances between the groups were unequal. Pearson correlation coefficient  
654 assay was used to analyze the expression correlation. Both significant differences ( $P <$   
655  $0.05$ ) and trends ( $P < 0.1$ ) were reported where appropriate for all tests performed.

## 656 **Abbreviations**

657 AS: atherosclerosis; CVD: cardiovascular Disease; ACS: acute coronary syndrome;  
658 ASVD: atherosclerotic vascular disease; MI: myocardial infarction; UAP: unstable  
659 angina pectoris; MACE: major adverse cardiovascular events; AE: Adverse event;  
660 CCTA: coronary computed tomography angiography; CAG: coronary angiography;  
661 PCI: percutaneous coronary intervention; DAPT: dual antiplatelet therapy; TMAO:  
662 trimethylamine N-Oxide;; SCFA: short-chain fatty acid; LPS: lipopolysaccharide; PGN:  
663 peptidoglycan; 16S rRNA: 16S ribosomal RNA; Treg: regulatory T cell; eATP:  
664 extracellular ATP; ADP: adenosine diphosphate; AMP: adenosine monophosphate;  
665 ADO: adenosine; ADORA2A: adenosine receptor A2A; ADORA2B: adenosine  
666 receptor A2B; KEGG: Kyoto Encyclopedia of Genes and Genomes;

## 667 **Competing Interests**

668 The authors have declared that no competing interest exists.

## 669 **Data availability**

670 Sequence data of 16S rRNA and metagenome that support the findings of this study  
671 have been deposited in National Center for Biotechnology Information (NCBI) with the  
672 primary accession code: SRP371254. Raw data of SCFA will be made available from  
673 the corresponding author upon reasonable request.

674

675

## 676 **References**

- 677 1 Li, B., Xia, Y. & Hu, B. Infection and atherosclerosis: TLR-dependent pathways. *Cell Mol*  
678 *Life Sci* **77**, 2751-2769, doi:10.1007/s00018-020-03453-7 (2020).
- 679 2 Ott, S. J. *et al.* Detection of diverse bacterial signatures in atherosclerotic lesions of patients

- 680 with coronary heart disease. *Circulation* **113**, 929-937,  
681 doi:10.1161/CIRCULATIONAHA.105.579979 (2006).
- 682 3 Koren, O. *et al.* Human oral, gut, and plaque microbiota in patients with atherosclerosis.  
683 *Proc Natl Acad Sci U S A* **108 Suppl 1**, 4592-4598, doi:10.1073/pnas.1011383107 (2011).
- 684 4 Stephen E. Epstein, J. Z., Mary Susan Burnett, Yi Fu Zhou, Gregory Vercellotti, David Hajjar.  
685 Infection and Atherosclerosis Potential Roles of Pathogen Burden and Molecular Mimicry.  
686 *Arterioscler Thromb Vasc Biol* **20**, doi:10.1161/01.atv.20.6.1417. (2020).
- 687 5 Brown, J. M. & Hazen, S. L. The gut microbial endocrine organ: bacterially derived signals  
688 driving cardiometabolic diseases. *Annu Rev Med* **66**, 343-359, doi:10.1146/annurev-  
689 med-060513-093205 (2015).
- 690 6 Bartolomeaus H, B. A., Yakoub M, Homann S, Markó L, Höges S, Tsvetkov D, Krannich A,  
691 Wundersitz S, Avery EG, Haase N, Kräker K, Hering L, Maase M, Kusche-Vihrog K,  
692 Grandoch M, Fielitz J, Kempa S, Gollasch M, Zhumadilov Z, Kozhakhmetov S. Short-Chain  
693 Fatty Acid Propionate Protects From Hypertensive Cardiovascular Damage. *Circulation* **11**,  
694 doi:10.1161/CIRCULATIONAHA.118.036652. (2019).
- 695 7 Chen, X. F., Chen, X. & Tang, X. Short-chain fatty acid, acylation and cardiovascular  
696 diseases. *Clin Sci (Lond)* **134**, 657-676, doi:10.1042/CS20200128 (2020).
- 697 8 Xu, Y. *et al.* Hepatocyte ATF3 protects against atherosclerosis by regulating HDL and bile  
698 acid metabolism. *Nat Metab* **3**, 59-74, doi:10.1038/s42255-020-00331-1 (2021).
- 699 9 Gistera, A. *et al.* Transforming growth factor-beta signaling in T cells promotes  
700 stabilization of atherosclerotic plaques through an interleukin-17-dependent pathway.  
701 *Sci Transl Med* **5**, 196ra100, doi:10.1126/scitranslmed.3006133 (2013).
- 702 10 Wang, Z. *et al.* Non-lethal Inhibition of Gut Microbial Trimethylamine Production for the  
703 Treatment of Atherosclerosis. *Cell* **163**, 1585-1595, doi:10.1016/j.cell.2015.11.055 (2015).
- 704 11 Karlsson, F. H. *et al.* Symptomatic atherosclerosis is associated with an altered gut  
705 metagenome. *Nat Commun* **3**, 1245, doi:10.1038/ncomms2266 (2012).
- 706 12 Laman, J. D., Schoneveld, A. H., Moll, F. L., van Meurs, M. & Pasterkamp, G. Significance of  
707 peptidoglycan, a proinflammatory bacterial antigen in atherosclerotic arteries and its  
708 association with vulnerable plaques. *Am J Cardiol* **90**, 119-123, doi:10.1016/s0002-  
709 9149(02)02432-3 (2002).
- 710 13 Laman, J. D., t Hart, B. A., Power, C. & Dziarski, R. Bacterial Peptidoglycan as a Driver of  
711 Chronic Brain Inflammation. *Trends Mol Med* **26**, 670-682,  
712 doi:10.1016/j.molmed.2019.11.006 (2020).
- 713 14 Saigusa, R., Winkels, H. & Ley, K. T cell subsets and functions in atherosclerosis. *Nat Rev*  
714 *Cardiol* **17**, 387-401, doi:10.1038/s41569-020-0352-5 (2020).
- 715 15 Meng, X. *et al.* Regulatory T cells in cardiovascular diseases. *Nat Rev Cardiol* **13**, 167-179,  
716 doi:10.1038/nrcardio.2015.169 (2016).
- 717 16 Shohei Hori, T. N., Shimon Sakaguchi. Control of Regulatory T Cell Development by the  
718 Transcription Factor Foxp3. *Science* **299** (2003).
- 719 17 Kim HJ, B. R., Kreslavsky T, Brown FD, Moffett H, Lemieux ME, Kaygusuz Y, Meissner T,  
720 Holderried TA, Chan S, Kastner P, Haining WN, Cantor H. Stable inhibitory activity of  
721 regulatory T cells requires the transcription factor Helios. *Science* **350**, 334-339,  
722 doi:10.1126/science.aad0616 (2015).
- 723 18 Liu, Z. D. *et al.* Increased Th17 cell frequency concomitant with decreased Foxp3+ Treg

- 724 cell frequency in the peripheral circulation of patients with carotid artery plaques. *Inflamm*  
725 *Res* **61**, 1155-1165, doi:10.1007/s00011-012-0510-2 (2012).
- 726 19 de Boer, O. J., van der Meer, J. J., Teeling, P., van der Loos, C. M. & van der Wal, A. C. Low  
727 numbers of FOXP3 positive regulatory T cells are present in all developmental stages of  
728 human atherosclerotic lesions. *PLoS One* **2**, e779, doi:10.1371/journal.pone.0000779  
729 (2007).
- 730 20 Kim, H. J., Hwang, S. J., Kim, B. K., Jung, K. C. & Chung, D. H. NKT cells play critical roles in  
731 the induction of oral tolerance by inducing regulatory T cells producing IL-10 and  
732 transforming growth factor beta, and by clonally deleting antigen-specific T cells.  
733 *Immunology* **118**, 101-111, doi:10.1111/j.1365-2567.2006.02346.x (2006).
- 734 21 Meng, X. *et al.* Regulatory T cells prevent plaque disruption in apolipoprotein E-knockout  
735 mice. *Int J Cardiol* **168**, 2684-2692, doi:10.1016/j.ijcard.2013.03.026 (2013).
- 736 22 Deaglio, S. *et al.* Adenosine generation catalyzed by CD39 and CD73 expressed on  
737 regulatory T cells mediates immune suppression. *J Exp Med* **204**, 1257-1265,  
738 doi:10.1084/jem.20062512 (2007).
- 739 23 Eid, R. E. *et al.* Interleukin-17 and interferon-gamma are produced concomitantly by  
740 human coronary artery-infiltrating T cells and act synergistically on vascular smooth  
741 muscle cells. *Circulation* **119**, 1424-1432, doi:10.1161/CIRCULATIONAHA.108.827618  
742 (2009).
- 743 24 Smith, E. *et al.* Blockade of interleukin-17A results in reduced atherosclerosis in  
744 apolipoprotein E-deficient mice. *Circulation* **121**, 1746-1755,  
745 doi:10.1161/CIRCULATIONAHA.109.924886 (2010).
- 746 25 Danzaki, K. *et al.* Interleukin-17A deficiency accelerates unstable atherosclerotic plaque  
747 formation in apolipoprotein E-deficient mice. *Arterioscler Thromb Vasc Biol* **32**, 273-280,  
748 doi:10.1161/ATVBAHA.111.229997 (2012).
- 749 26 Madhur, M. S. *et al.* Role of interleukin 17 in inflammation, atherosclerosis, and vascular  
750 function in apolipoprotein e-deficient mice. *Arterioscler Thromb Vasc Biol* **31**, 1565-1572,  
751 doi:10.1161/ATVBAHA.111.227629 (2011).
- 752 27 Valgimigli, M. *et al.* 2017 ESC focused update on dual antiplatelet therapy in coronary  
753 artery disease developed in collaboration with EACTS: The Task Force for dual antiplatelet  
754 therapy in coronary artery disease of the European Society of Cardiology (ESC) and of the  
755 European Association for Cardio-Thoracic Surgery (EACTS). *Eur Heart J* **39**, 213-260,  
756 doi:10.1093/eurheartj/ehx419 (2018).
- 757 28 Wallentin L, B. R., Budaj A, Cannon CP, Emanuelsson H, Held C, Horrow J, Husted S, James  
758 S, Katus H, Mahaffey KW, Scirica BM, Skene A, Steg PG, Storey RF, Harrington RA; PLATO  
759 Investigators, Freij A, Thorsén M. Ticagrelor versus Clopidogrel in Patients with Acute  
760 Coronary Syndromes. *N Engl J Med* **361**, doi:10.1056/NEJMoa0904327. (2009).
- 761 29 Bonaca, M. P. *et al.* Efficacy and Safety of Ticagrelor Over Time in Patients With Prior MI  
762 in PEGASUS-TIMI 54. *J Am Coll Cardiol* **70**, 1368-1375, doi:10.1016/j.jacc.2017.07.768  
763 (2017).
- 764 30 Verdoia, M., Savonitto, S., Dudek, D., Kedhi, E. & De Luca, G. Ticagrelor as compared to  
765 conventional antiplatelet agents in coronary artery disease: A comprehensive meta-  
766 analysis of 15 randomized trials. *Vascul Pharmacol* **137**, 106828,  
767 doi:10.1016/j.vph.2020.106828 (2021).



- 768 31 Storey, R. F. *et al.* Lower mortality following pulmonary adverse events and sepsis with  
769 ticagrelor compared to clopidogrel in the PLATO study. *Platelets* **25**, 517-525,  
770 doi:10.3109/09537104.2013.842965 (2014).
- 771 32 Sexton, T. R. *et al.* Ticagrelor Reduces Thromboinflammatory Markers in Patients With  
772 Pneumonia. *JACC Basic Transl Sci* **3**, 435-449, doi:10.1016/j.jacbts.2018.05.005 (2018).
- 773 33 Patrizio Lancellotti LM, N. J., et al. . Antibacterial Activity of Ticagrelor in Conventional  
774 Antiplatelet Dosages Against Antibiotic-Resistant Gram-Positive Bacteria. *JAMA*  
775 *Cardiology* **4**, doi:10.1001/jamacardio.2019.1189. (2019).
- 776 34 He, S. *et al.* Gut intraepithelial T cells calibrate metabolism and accelerate cardiovascular  
777 disease. *Nature* **566**, 115-119, doi:10.1038/s41586-018-0849-9 (2019).
- 778 35 Brown, E. M., Kenny, D. J. & Xavier, R. J. Gut Microbiota Regulation of T Cells During  
779 Inflammation and Autoimmunity. *Annu Rev Immunol* **37**, 599-624, doi:10.1146/annurev-  
780 immunol-042718-041841 (2019).
- 781 36 Brandsma, E. *et al.* A Proinflammatory Gut Microbiota Increases Systemic Inflammation  
782 and Accelerates Atherosclerosis. *Circ Res* **124**, 94-100,  
783 doi:10.1161/CIRCRESAHA.118.313234 (2019).
- 784 37 Kanthi, Y. *et al.* Flow-dependent expression of ectonucleotide tri(di)phosphohydrolase-1  
785 and suppression of atherosclerosis. *J Clin Invest* **125**, 3027-3036, doi:10.1172/JCI79514  
786 (2015).
- 787 38 Wei, J. *et al.* Dietary Polysaccharide from *Enteromorpha clathrata* Attenuates Obesity and  
788 Increases the Intestinal Abundance of Butyrate-Producing Bacterium, *Eubacterium*  
789 *xylanophilum*, in Mice Fed a High-Fat Diet. *Polymers (Basel)* **13**,  
790 doi:10.3390/polym13193286 (2021).
- 791 39 Jonsson, A. L. & Backhed, F. Role of gut microbiota in atherosclerosis. *Nat Rev Cardiol* **14**,  
792 79-87, doi:10.1038/nrcardio.2016.183 (2017).
- 793 40 Lal, G. *et al.* Distinct inflammatory signals have physiologically divergent effects on  
794 epigenetic regulation of Foxp3 expression and Treg function. *Am J Transplant* **11**, 203-  
795 214, doi:10.1111/j.1600-6143.2010.03389.x (2011).
- 796 41 Park, S. Y., Jing, X., Gupta, D. & Dziarski, R. Peptidoglycan recognition protein 1 enhances  
797 experimental asthma by promoting Th2 and Th17 and limiting regulatory T cell and  
798 plasmacytoid dendritic cell responses. *J Immunol* **190**, 3480-3492,  
799 doi:10.4049/jimmunol.1202675 (2013).
- 800 42 Krakauer, T., Pradhan, K. & Stiles, B. G. Staphylococcal Superantigens Spark Host-  
801 Mediated Danger Signals. *Front Immunol* **7**, 23, doi:10.3389/fimmu.2016.00023 (2016).
- 802 43 Peters, E., Heemskerk, S., Masereeuw, R. & Pickkers, P. Alkaline phosphatase: a possible  
803 treatment for sepsis-associated acute kidney injury in critically ill patients. *Am J Kidney Dis*  
804 **63**, 1038-1048, doi:10.1053/j.ajkd.2013.11.027 (2014).
- 805 44 Ahern, P. P., Faith, J. J. & Gordon, J. I. Mining the human gut microbiota for effector strains  
806 that shape the immune system. *Immunity* **40**, 815-823, doi:10.1016/j.immuni.2014.05.012  
807 (2014).
- 808 45 Geva-Zatorsky, N. *et al.* Mining the Human Gut Microbiota for Immunomodulatory  
809 Organisms. *Cell* **168**, 928-943 e911, doi:10.1016/j.cell.2017.01.022 (2017).
- 810 46 Belkaid, Y. & Hand, T. W. Role of the microbiota in immunity and inflammation. *Cell* **157**,  
811 121-141, doi:10.1016/j.cell.2014.03.011 (2014).

- 812 47 Clemente, J. C., Manasson, J. & Scher, J. U. The role of the gut microbiome in systemic  
813 inflammatory disease. *BMJ* **360**, j5145, doi:10.1136/bmj.j5145 (2018).
- 814 48 Pickard, J. M., Zeng, M. Y., Caruso, R. & Nunez, G. Gut microbiota: Role in pathogen  
815 colonization, immune responses, and inflammatory disease. *Immunol Rev* **279**, 70-89,  
816 doi:10.1111/imr.12567 (2017).
- 817 49 Liu, Y. J. *et al.* Parthenolide ameliorates colon inflammation through regulating Treg/Th17  
818 balance in a gut microbiota-dependent manner. *Theranostics* **10**, 5225-5241,  
819 doi:10.7150/thno.43716 (2020).
- 820 50 Cekanaviciute, E. *et al.* Gut bacteria from multiple sclerosis patients modulate human T  
821 cells and exacerbate symptoms in mouse models. *Proc Natl Acad Sci U S A* **114**, 10713-  
822 10718, doi:10.1073/pnas.1711235114 (2017).
- 823 51 Potekhina, A. V. *et al.* Treg/Th17 balance in stable CAD patients with different stages of  
824 coronary atherosclerosis. *Atherosclerosis* **238**, 17-21,  
825 doi:10.1016/j.atherosclerosis.2014.10.088 (2015).
- 826 52 Nordlohne, J. *et al.* Aggravated Atherosclerosis and Vascular Inflammation With Reduced  
827 Kidney Function Depend on Interleukin-17 Receptor A and Are Normalized by Inhibition  
828 of Interleukin-17A. *JACC Basic Transl Sci* **3**, 54-66, doi:10.1016/j.jacbts.2017.08.005 (2018).
- 829 53 Brauner, S. *et al.* Augmented Th17 differentiation in Trim21 deficiency promotes a stable  
830 phenotype of atherosclerotic plaques with high collagen content. *Cardiovasc Res* **114**,  
831 158-167, doi:10.1093/cvr/cvx181 (2018).
- 832 54 Hannachi, N. *et al.* Antiplatelet Agents Have a Distinct Efficacy on Platelet Aggregation  
833 Induced by Infectious Bacteria. *Front Pharmacol* **11**, 863, doi:10.3389/fphar.2020.00863  
834 (2020).
- 835 55 Ulloa, E. R., Uchiyama, S., Gillespie, R., Nizet, V. & Sakoulas, G. Ticagrelor Increases  
836 Platelet-Mediated Staphylococcus aureus Killing, Resulting in Clearance of Bacteremia. *J*  
837 *Infect Dis* **224**, 1566-1569, doi:10.1093/infdis/jiab146 (2021).
- 838 56 Tatara, A. M., Gandhi, R. G., Mooney, D. J. & Nelson, S. B. Antiplatelet therapy for  
839 Staphylococcus aureus bacteremia: Will it stick? *PLoS Pathog* **18**, e1010240,  
840 doi:10.1371/journal.ppat.1010240 (2022).
- 841 57 Butt, J. H. *et al.* Ticagrelor and the risk of Staphylococcus aureus bacteraemia and other  
842 infections. *Eur Heart J Cardiovasc Pharmacother* **8**, 13-19, doi:10.1093/ehjcvp/pvaa099  
843 (2022).
- 844 58 Natividad, J. M. *et al.* Bilophila wadsworthia aggravates high fat diet induced metabolic  
845 dysfunctions in mice. *Nat Commun* **9**, 2802, doi:10.1038/s41467-018-05249-7 (2018).
- 846 59 Huart, J. *et al.* Gut Microbiota and Fecal Levels of Short-Chain Fatty Acids Differ Upon 24-  
847 Hour Blood Pressure Levels in Men. *Hypertension* **74**, 1005-1013,  
848 doi:10.1161/HYPERTENSIONAHA.118.12588 (2019).
- 849 60 Yue, C. *et al.* Medium-, long- and medium-chain-type structured lipids ameliorate high-  
850 fat diet-induced atherosclerosis by regulating inflammation, adipogenesis, and gut  
851 microbiota in ApoE(-/-) mice. *Food Funct* **11**, 5142-5155, doi:10.1039/d0fo01006e (2020).
- 852 61 Song, Y. *et al.* Effects of three different mannans on obesity and gut microbiota in high-  
853 fat diet-fed C57BL/6J mice. *Food Funct* **12**, 4606-4620, doi:10.1039/d0fo03331f (2021).
- 854 62 Liu, X. *et al.* Blautia-a new functional genus with potential probiotic properties? *Gut*  
855 *Microbes* **13**, 1-21, doi:10.1080/19490976.2021.1875796 (2021).

- 856 63 Sun, D. *et al.* Anti-peptidoglycan antibodies and Fcγ receptors are the key  
857 mediators of inflammation in Gram-positive sepsis. *J Immunol* **189**, 2423-2431,  
858 doi:10.4049/jimmunol.1201302 (2012).
- 859 64 Park, S. Y., Gupta, D., Kim, C. H. & Dziarski, R. Differential effects of peptidoglycan  
860 recognition proteins on experimental atopic and contact dermatitis mediated by Treg and  
861 Th17 cells. *PLoS One* **6**, e24961, doi:10.1371/journal.pone.0024961 (2011).
- 862 65 Josefowicz, S. Z., Lu, L. F. & Rudensky, A. Y. Regulatory T cells: mechanisms of  
863 differentiation and function. *Annu Rev Immunol* **30**, 531-564,  
864 doi:10.1146/annurev.immunol.25.022106.141623 (2012).
- 865 66 Joseph Barbi, D. P., Fan Pan. Treg functional stability and its responsiveness to the  
866 microenvironment. *Immunological Reviews* **259**, doi:10.1111/imr.12172. (2014).
- 867 67 Wang, E. S. *et al.* Acute pharmacological degradation of Helios destabilizes regulatory T  
868 cells. *Nat Chem Biol* **17**, 711-717, doi:10.1038/s41589-021-00802-w (2021).
- 869 68 Takatori, H. *et al.* Helios Enhances Treg Cell Function in Cooperation With FoxP3. *Arthritis*  
870 *Rheumatol* **67**, 1491-1502, doi:10.1002/art.39091 (2015).
- 871 69 Bedke, T., Muscate, F., Soukou, S., Gagliani, N. & Huber, S. Title: IL-10-producing T cells  
872 and their dual functions. *Semin Immunol* **44**, 101335, doi:10.1016/j.smim.2019.101335  
873 (2019).
- 874 70 Akhavanpoor, M. *et al.* The Two Faces of Interleukin-17A in Atherosclerosis. *Curr Drug*  
875 *Targets* **18**, 863-873, doi:10.2174/1389450117666161229142155 (2017).
- 876 71 Qin, C. *et al.* Critical Role of P2Y12 Receptor in Regulation of Th17 Differentiation and  
877 Experimental Autoimmune Encephalomyelitis Pathogenesis. *J Immunol* **199**, 72-81,  
878 doi:10.4049/jimmunol.1601549 (2017).
- 879 72 Jacob, F., Perez Novo, C., Bachert, C. & Van Crombruggen, K. Purinergic signaling in  
880 inflammatory cells: P2 receptor expression, functional effects, and modulation of  
881 inflammatory responses. *Purinergic Signal* **9**, 285-306, doi:10.1007/s11302-013-9357-4  
882 (2013).
- 883 73 Stachon, P. *et al.* Extracellular ATP Induces Vascular Inflammation and Atherosclerosis via  
884 Purinergic Receptor Y2 in Mice. *Arterioscler Thromb Vasc Biol* **36**, 1577-1586,  
885 doi:10.1161/ATVBAHA.115.307397 (2016).
- 886 74 Buchheiser, A. *et al.* Inactivation of CD73 promotes atherogenesis in apolipoprotein E-  
887 deficient mice. *Cardiovasc Res* **92**, 338-347, doi:10.1093/cvr/cvr218 (2011).
- 888 75 Allard, B., Beavis, P. A., Darcy, P. K. & Stagg, J. Immunosuppressive activities of adenosine  
889 in cancer. *Curr Opin Pharmacol* **29**, 7-16, doi:10.1016/j.coph.2016.04.001 (2016).
- 890 76 Reiner, M. F. *et al.* Ticagrelor, but not clopidogrel, reduces arterial thrombosis via  
891 endothelial tissue factor suppression. *Cardiovasc Res* **113**, 61-69, doi:10.1093/cvr/cvw233  
892 (2017).
- 893 77 Authors/Task Force, m. *et al.* 2014 ESC/EACTS Guidelines on myocardial revascularization:  
894 The Task Force on Myocardial Revascularization of the European Society of Cardiology  
895 (ESC) and the European Association for Cardio-Thoracic Surgery (EACTS) Developed with  
896 the special contribution of the European Association of Percutaneous Cardiovascular  
897 Interventions (EAPCI). *Eur Heart J* **35**, 2541-2619, doi:10.1093/eurheartj/ehu278 (2014).
- 898 78 Chen, S., Zhou, Y., Chen, Y. & Gu, J. fastp: an ultra-fast all-in-one FASTQ preprocessor.  
899 *Bioinformatics* **34**, i884-i890, doi:10.1093/bioinformatics/bty560 (2018).

- 900 79 Magoc, T. & Salzberg, S. L. FLASH: fast length adjustment of short reads to improve  
901 genome assemblies. *Bioinformatics* **27**, 2957-2963, doi:10.1093/bioinformatics/btr507  
902 (2011).
- 903 80 Callahan, B. J. *et al.* DADA2: High-resolution sample inference from Illumina amplicon  
904 data. *Nat Methods* **13**, 581-583, doi:10.1038/nmeth.3869 (2016).
- 905 81 Davis, S. *et al.* Leveraging crowdsourcing to accelerate global health solutions. *Nat*  
906 *Biotechnol* **37**, 848-850, doi:10.1038/s41587-019-0180-5 (2019).
- 907 82 Asshauer, K. P., Wemheuer, B., Daniel, R. & Meinicke, P. Tax4Fun: predicting functional  
908 profiles from metagenomic 16S rRNA data. *Bioinformatics* **31**, 2882-2884,  
909 doi:10.1093/bioinformatics/btv287 (2015).
- 910 83 Li, H. & Durbin, R. Fast and accurate short read alignment with Burrows-Wheeler  
911 transform. *Bioinformatics* **25**, 1754-1760, doi:10.1093/bioinformatics/btp324 (2009).
- 912 84 Li, D., Liu, C. M., Luo, R., Sadakane, K. & Lam, T. W. MEGAHIT: an ultra-fast single-node  
913 solution for large and complex metagenomics assembly via succinct de Bruijn graph.  
914 *Bioinformatics* **31**, 1674-1676, doi:10.1093/bioinformatics/btv033 (2015).
- 915 85 Buchfink, B., Xie, C. & Huson, D. H. Fast and sensitive protein alignment using DIAMOND.  
916 *Nat Methods* **12**, 59-60, doi:10.1038/nmeth.3176 (2015).

WITHDRAWN  
see manuscript DOI for details

917

| Table 1  Characteristics of study participants |                              |                               |                    |
|------------------------------------------------|------------------------------|-------------------------------|--------------------|
|                                                | Ticagrelor-aspirin<br>(n=11) | Clopidogrel-aspirin<br>(n=10) | P value<br>TAVs CA |
| <b>Demographics</b>                            |                              |                               |                    |
| Males (n)                                      | 6                            | 7                             | 0.659*             |
| Age (years)                                    | 59.5±1.6                     | 59.1±1.9                      | 0.89 <sup>†</sup>  |
| BMI(kg/m <sup>2</sup> )                        |                              | 26.7±3.8                      | 0.52 <sup>†</sup>  |
| Current smoker(n)                              | 2                            | 3                             | 0.635*             |
| Hypertension(n)                                | 7                            | 5                             | 0.67*              |
| Diabetes(n)                                    | 5                            | 4                             | 1*                 |
| Previous myocardial infarction(n)              | 0                            | 0                             | 1*                 |
| <b>Medication History</b>                      |                              |                               |                    |
| Statin treatment(n)                            | 6                            | 5                             | 1*                 |
| Asprin(n)                                      | 0                            | 0                             | 1*                 |
| Beta blocker treatment(n)                      | 3                            | 2                             | 1*                 |
| ACE/ARB treatment(n)                           | 3                            | 2                             | 1*                 |
| Antidiabetic(n)                                | 5                            | 4                             | 1*                 |
| <b>Laboratory variables</b>                    |                              |                               |                    |
| Cholesterol,(mmol/L)                           |                              |                               |                    |
| Baseline                                       | 4.13±0.85                    | 3.69±0.72                     | 0.22 <sup>†</sup>  |
| On treatment                                   | 3.34±0.66                    | 3.58±0.49                     | 0.35 <sup>†</sup>  |
| Triglycerides,(mmol/L)                         |                              |                               |                    |
| Baseline                                       | 2.35±1.4                     | 1.67±0.68                     | 0.18 <sup>†</sup>  |
| On treatment                                   | 1.85±1.02                    | 1.53±0.63                     | 0.4 <sup>†</sup>   |
| HDL-C,(mmol/L)                                 |                              |                               |                    |
| Baseline                                       | 0.86±1.83                    | 0.92±0.28                     | 0.54 <sup>†</sup>  |
| On treatment                                   | 0.98±0.2                     | 1.08±0.24                     | 0.33 <sup>†</sup>  |
| LDL-C,(mmol/L)                                 |                              |                               |                    |
| Baseline                                       | 2.42±0.58                    | 2.17±0.54                     | 0.32 <sup>†</sup>  |
| On treatment                                   | 1.7±0.59                     | 1.97±0.45                     | 0.25 <sup>†</sup>  |
| WBC(*10 <sup>9</sup> /L)                       |                              |                               |                    |
| Baseline                                       | 6.74±1.92                    | 5.71±1.57                     | 0.2 <sup>†</sup>   |
| On treatment                                   | 6.54±1.29                    | 6.14±1.6                      | 0.53 <sup>†</sup>  |
| Neutrophil relative value(%)                   |                              |                               |                    |
| Baseline                                       | 64.71±10.83                  | 57.69±6.82                    | 0.11 <sup>†</sup>  |
| On treatment                                   | 59.87±8.72                   | 58.81±5.77                    | 0.75 <sup>†</sup>  |
| Lymphocyte relative value(%)                   |                              |                               |                    |
| Baseline                                       | 25.85±7.26                   | 30.79±6.36                    | 0.12 <sup>†</sup>  |
| On treatment                                   | 31.01±6.75                   | 28.68±5.92                    | 0.45 <sup>†</sup>  |

\*Fisher's exact test. <sup>†</sup>Welch's t-test. BMI=body mass index; ACE=angiotensin-converting enzyme; ARB= angiotensin receptor blocker; HDL=high-density lipoprotein; LDL= low-density lipoprotein

918

919 **Table1 Characteristics of study participants.**

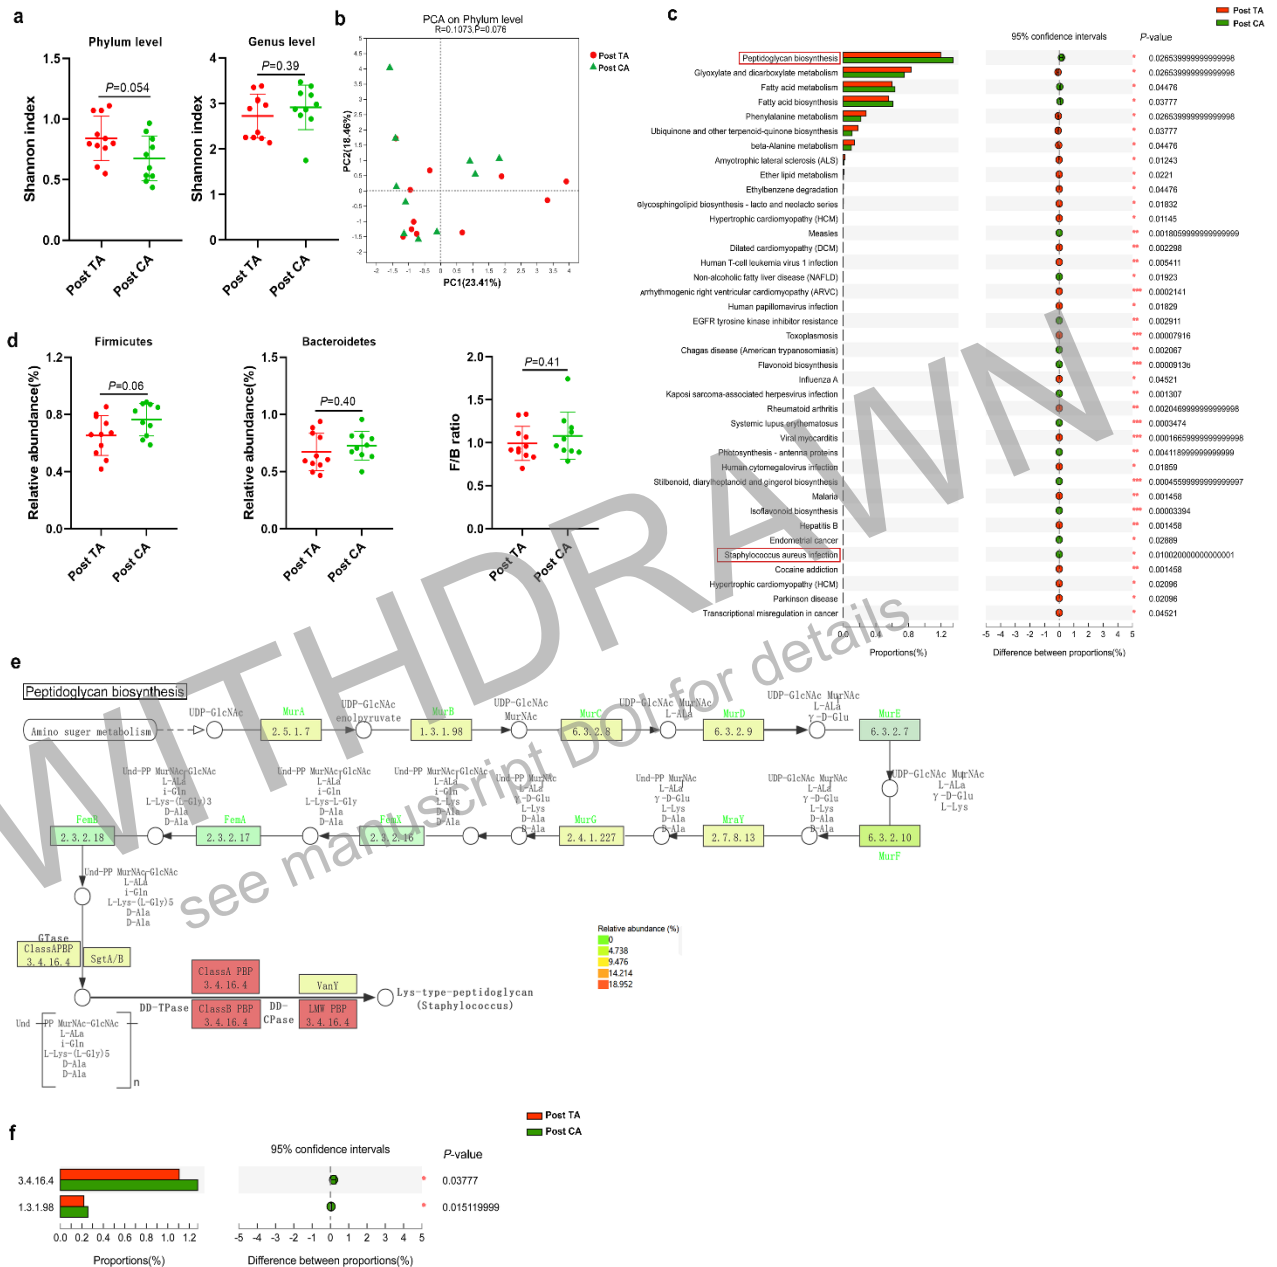

920

921 **Figure 1. Distinct gut microbial composition and function under the one-month**

922 **treatments of ticagrelor-aspirin and clopidogrel-aspirin in individuals with UAP.**

923 Shannon index at the phylum and genus levels by 16S rRNA (a). Principal coordinate

924 analysis (PCA) at the phylum level was performed based on Bray-curtis (b). Relative

925 abundance of *Firmicutes* and *Bacteroidetes* at the phylum level, and the *Firmicutes* to

926 *Bacteroidetes* (F/B) ratio by 16S rRNA (c). Kyoto Encyclopedia of Genes and Genomes

927 (KEGG) pathways generated from the metagenomic analysis based on the reads number

928 relative (d). Expression of enzymes involved in PGN biosynthesis based on the KEGG



929 Orthology database (e). Proportions of two enzymes that had statistical differences  
930 involved in PGN biosynthesis (f). The 2-tailed Student's t-test was used to detect  
931 significant difference between two groups (a-e). Data were expressed as mean±SEM  
932 (a, b). PGN biosynthesis pathway map (map00550) is cited from  
933 <http://www.kegg.jp/kegg/kegg1.html> with permission. PGN: peptidoglycan. Post TA:  
934 Post ticagrelor-aspirin. Post CA: Post clopidogrel-aspirin.  
935

WITHDRAWN  
see manuscript DOI for details

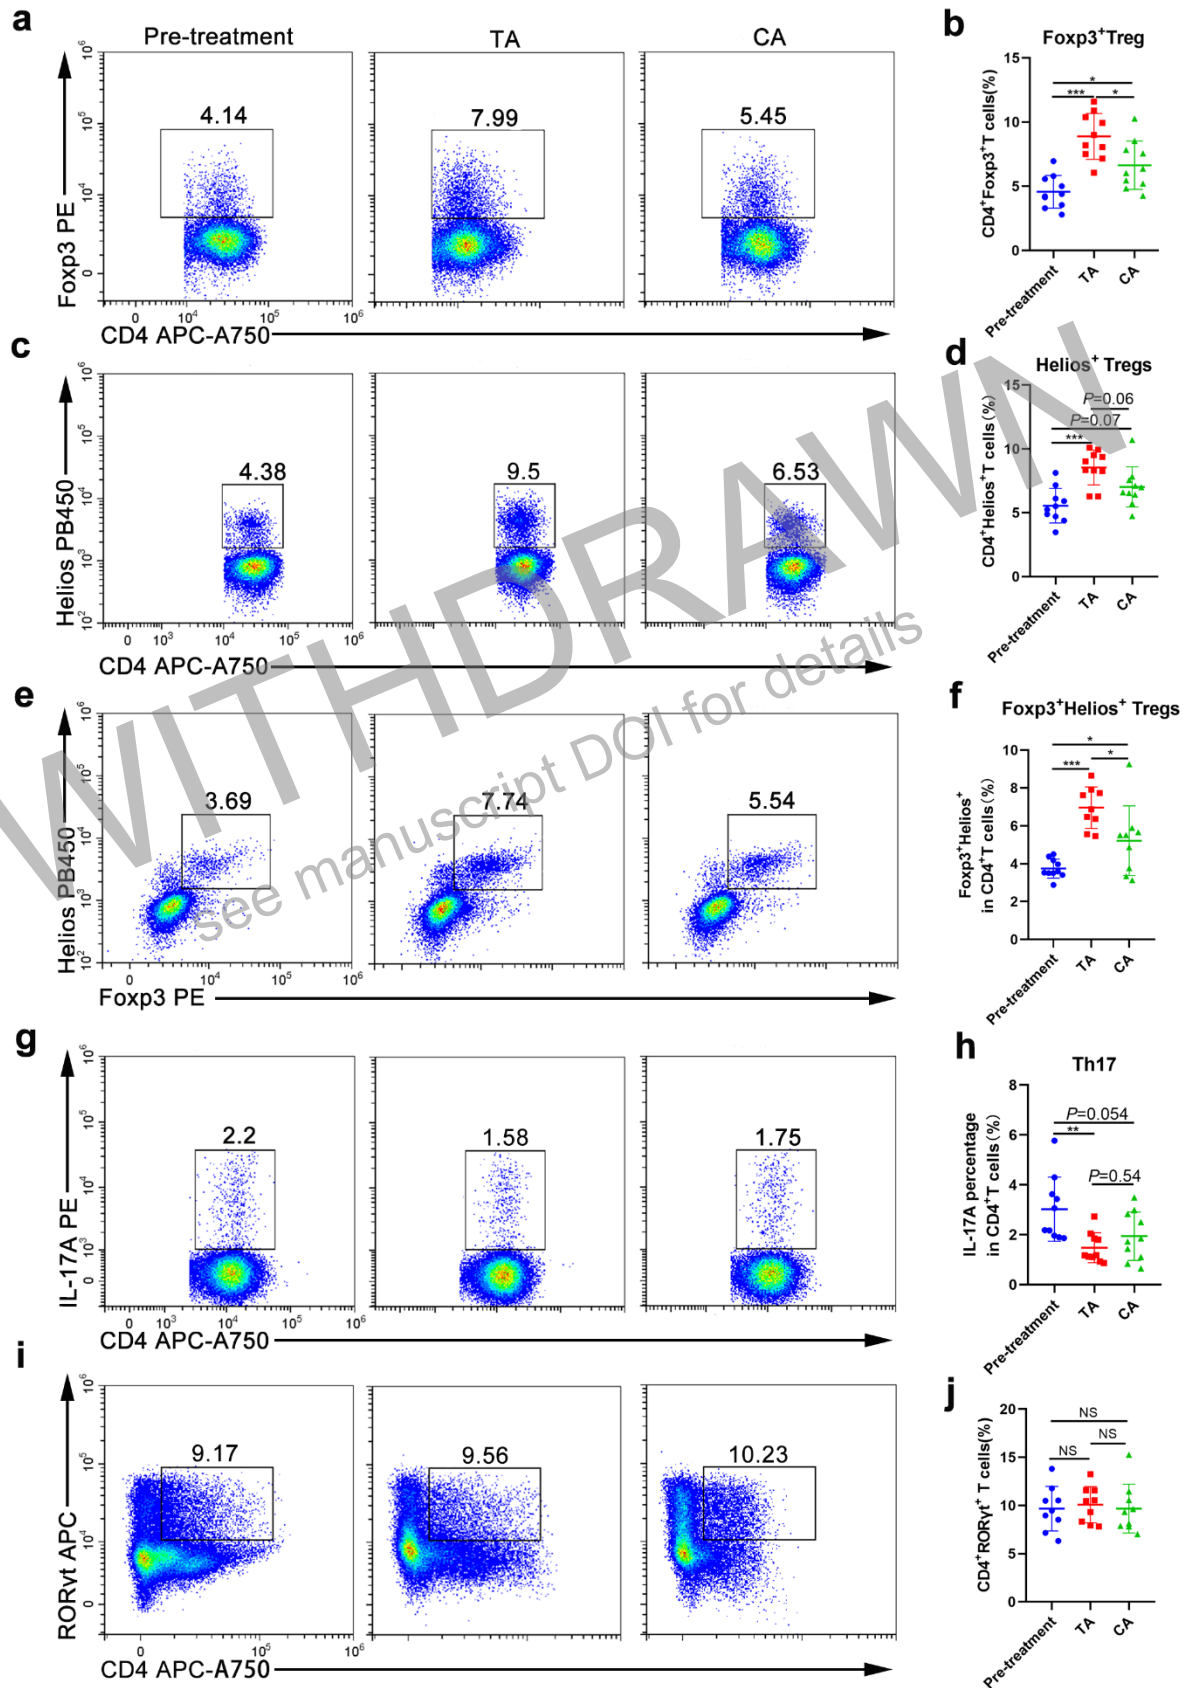

936

937 **Figure 2. Ticagrelor-aspirin increased the Tregs but not Th17 cells compared to**

938 **clopidogrel-aspirin. Representative flow cytometry plots and quantifications of**

939 regulatory T cells and Th17 cells in the PBMC from individuals of pre-treatment, TA,  
940 and CA groups (**a-j**). Representative flow cytometry plots (**a, c, e**) and quantifications  
941 (**b, d, f**) of Foxp3<sup>+</sup>, Helios<sup>+</sup>, and Foxp3<sup>+</sup>Helios<sup>+</sup> Tregs respectively within the CD4<sup>+</sup>  
942 population. Representative flow cytometry plots (**g, i**) and quantifications (**h, j**) of  
943 RORγt<sup>+</sup> and IL-17A<sup>+</sup> Th17 respectively within the CD4<sup>+</sup> population. Each symbol  
944 represents an individual in diverse group. Data were shown as mean ± SEM and were  
945 analyzed by one-way ANOVA followed by a *post hoc* Tukey's test. TA: ticagrelor-  
946 aspirin, CA: clopidogrel-aspirin, PBMC: Peripheral blood mononuclear cells, Foxp3:  
947 Forkhead box protein P3, a transcription factor of Treg, Helios: a transcription factor of  
948 Tregs, RORγt: RAR-related orphan receptor γt, a transcription factor of Th17. IL-17A:  
949 interleukin 17A. \**P*<0.05, \*\**P*<0.01, \*\*\**P*<0.001

950

951

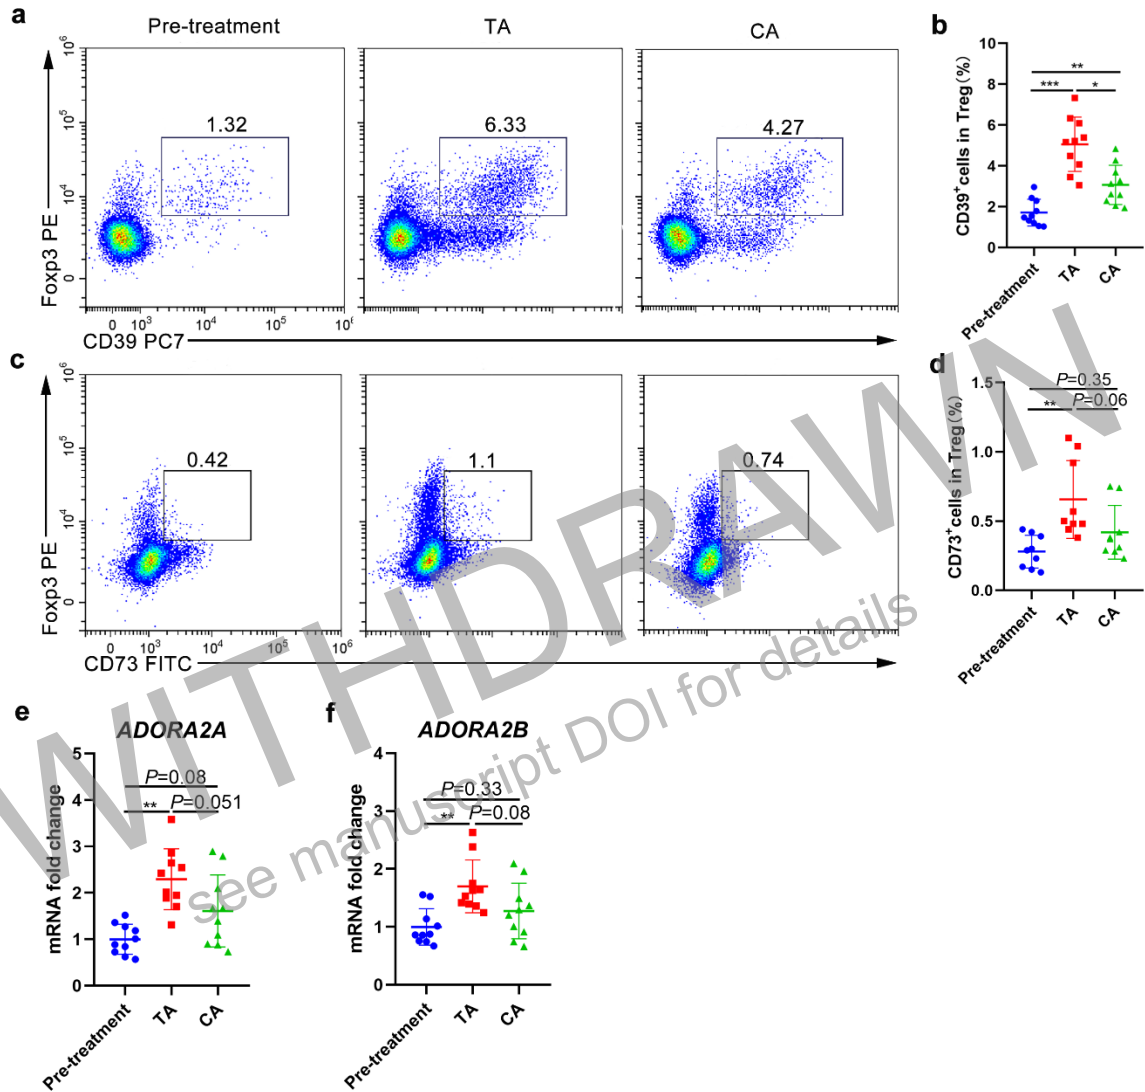

952

953 **Figure 3. Ticagrelor-aspirin induced higher CD39/CD73 expression on Tregs**

954 **mediated partially the anti-inflammatory effect in human.** Representative flow

955 cytometry plots (a, c) and quantifications (b, d) of CD39<sup>+</sup>Foxp3<sup>+</sup> and

956 CD73<sup>+</sup>Foxp3<sup>+</sup> cells within the CD4<sup>+</sup> populations. The gene expressions *ADORA2A* and

957 *ADORA2B* in PBMC were analyzed by qPCR and normalized to  $\beta$ -*ACTIN* (e, f). Each

958 symbol represents an individual in diverse group. TA: ticagrelor-aspirin, CA:

959 clopidogrel-aspirin. Data were shown as mean  $\pm$  SEM and were analyzed by one-way

960 ANOVA followed by a *post hoc* Tukey's test. ADORA2A: adenosine receptor A2A.

961 ADORA2B: adenosine receptor A2B. \* $P < 0.05$ , \*\* $P < 0.01$ , \*\*\* $P < 0.001$

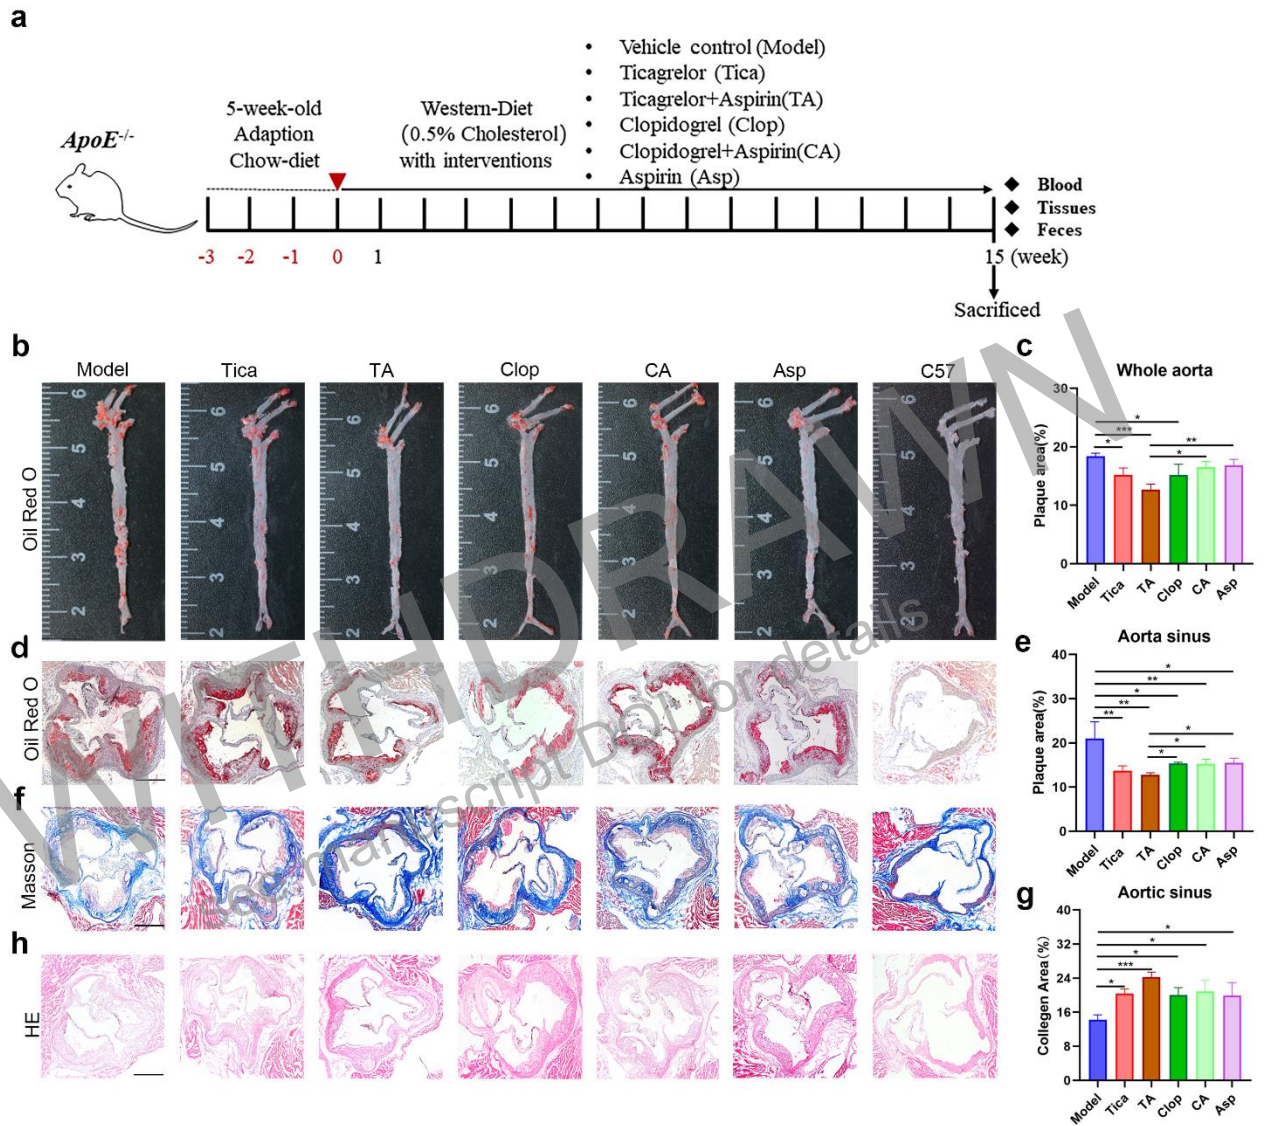

962

963 **Figure 4. Effects of different antiplatelet medications' treatments limited plaque**

964 **progression in atherosclerotic *ApoE*<sup>-/-</sup> mice.** Schematic diagram of diverse treatments

965 in *ApoE*<sup>-/-</sup> mice (a). Representative of Oil Red O in the whole aorta and aorta sinus (b,

966 d). Quantifications of Oil Red O in the whole aorta and aorta sinus (c, e). Representative

967 and quantification of Masson staining in aorta sinus (f, g). Representative histological

968 H&E section of the aorta sinus (h). Scar bar, 200 μm. Tica: ticagrelor. TA:

969 ticagrelor+aspirin. Clop: clopidogrel. CA: clopidogrel+aspirin. Asp: aspirin. Data were

970 shown as mean ± SEM and were analyzed by one-way ANOVA followed by a *post hoc*

971 Tukey's test. \**P*<0.05, \*\**P*<0.01, \*\*\**P*<0.001



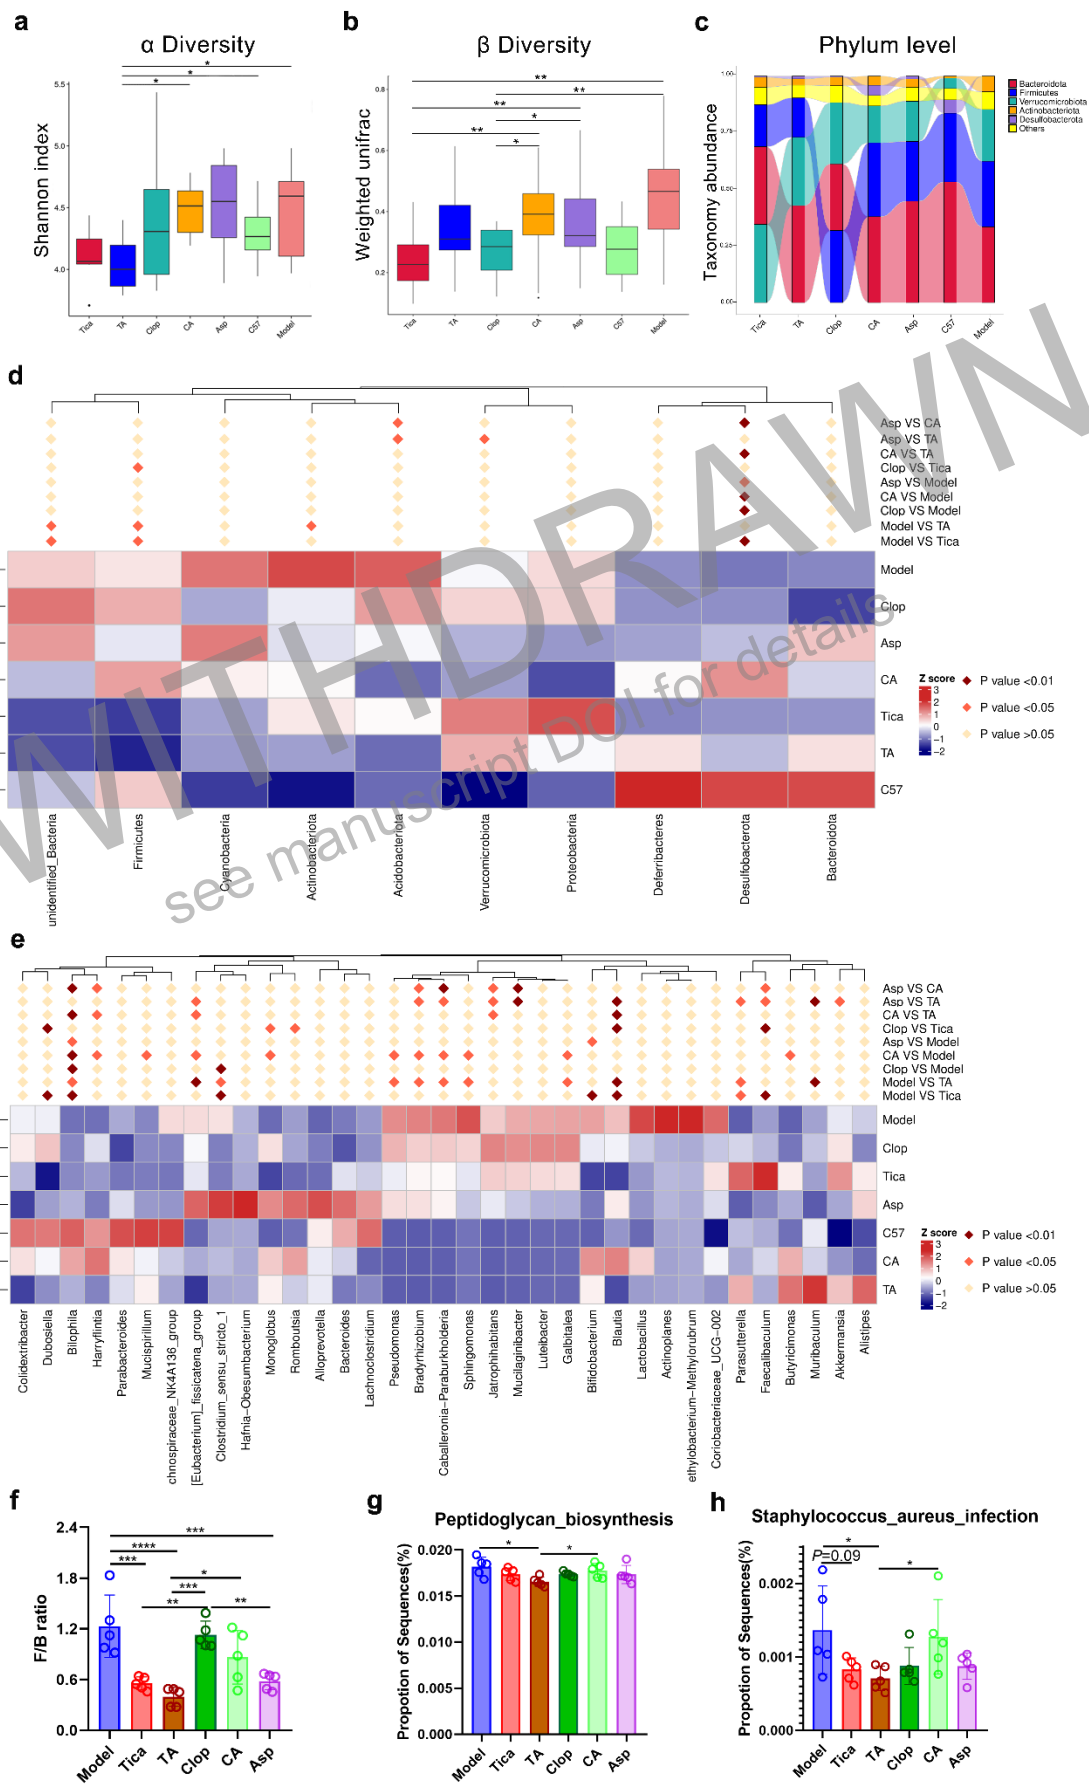

972



973 **Figure 5. Ticagrelor and Ticagrelor-aspirin regulated the gut microbiota to a**  
974 **“healthier” state in atherosclerotic *ApoE*<sup>-/-</sup> mice.**  $\alpha$  diversity of Shannon index (a)  
975 and  $\beta$  diversity by weighted unifracs (b). Relative abundance of taxa at the phylum level  
976 (c). Matastat analysis of the relative proportion of taxa at the phylum level (d) and genus  
977 level (e). *Firmicutes to Bacteroidetes (F/B)* ratio (f). PGN and *S. aureus* infection  
978 pathways were predicted by Tax4fun of 16S rRNA sequencing data (g, h). PGN:  
979 peptidoglycan. *S. aureus*: *staphylococcus aureus*. Tica: ticagrelor. TA:  
980 ticagrelor+aspirin. Clop: clopidogrel. CA: clopidogrel+aspirin. Asp: aspirin. Data  
981 were shown as mean  $\pm$  SEM and were analyzed by one-way ANOVA followed by a  
982 *post hoc* Tukey’s test. \* $P < 0.05$ , \*\* $P < 0.01$ , \*\*\* $P < 0.001$ .

983  
984  
985  
986  
987

WITHDRAWN  
see manuscript DOI for details

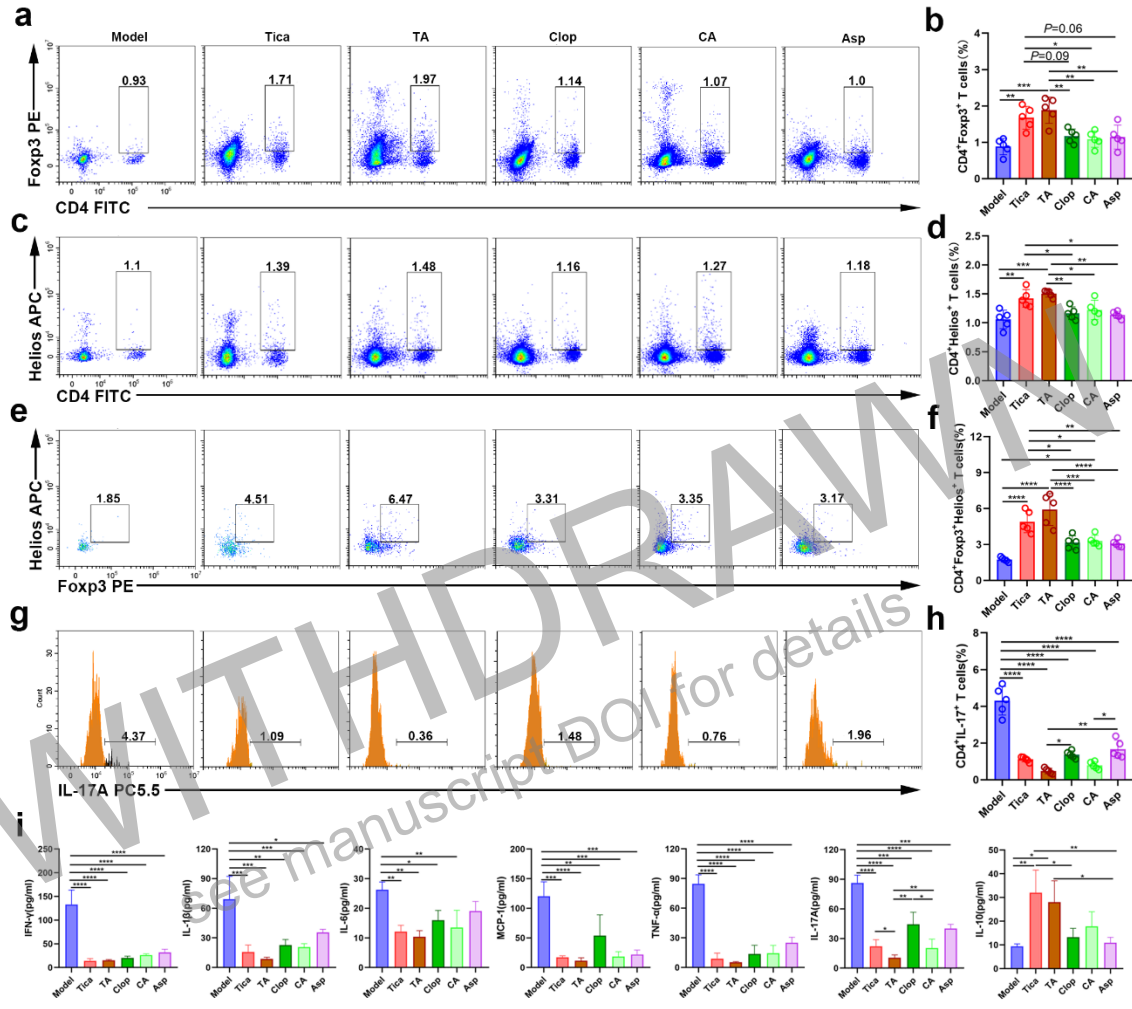

988

989 **Figure 6. Ticagrelor-aspirin exerted optimal synergistic effects among all the**  
 990 **antiplatelet medicine in balancing the Treg/Th17 axis and anti-inflammatory**  
 991 **profile in atherosclerotic *ApoE*<sup>-/-</sup> mice. Representative flow cytometry plots (a, c, e)**  
 992 **and quantifications (b, d, f) of Foxp3<sup>+</sup>, Helios<sup>+</sup>, and Foxp3<sup>+</sup>Helios<sup>+</sup> Tregs respectively**  
 993 **within the CD4<sup>+</sup> population in blood. Representative flow cytometry plots (g) and**  
 994 **quantifications (h) of IL-17A<sup>+</sup> Th17 within the CD4<sup>+</sup> population in blood.**  
 995 **Inflammatory cytokines (IFN- $\gamma$ , IL-1 $\beta$ , IL-6, MCP-1, TNF- $\alpha$ , IL-17A, and IL-10) were**  
 996 **detected and quantified in plasma (i). Tica: ticagrelor. TA: ticagrelor+aspirin. Clop:**  
 997 **clopidogrel. CA: clopidogrel+aspirin. Asp: aspirin. Data were shown as mean  $\pm$  SEM**  
 998 **and were analyzed by one-way ANOVA followed by a *post hoc* Tukey's test. \* $P$ <0.05,**  
 999 **\*\* $P$ <0.01, \*\*\* $P$ <0.001, \*\*\*\* $P$ <0.0001.**

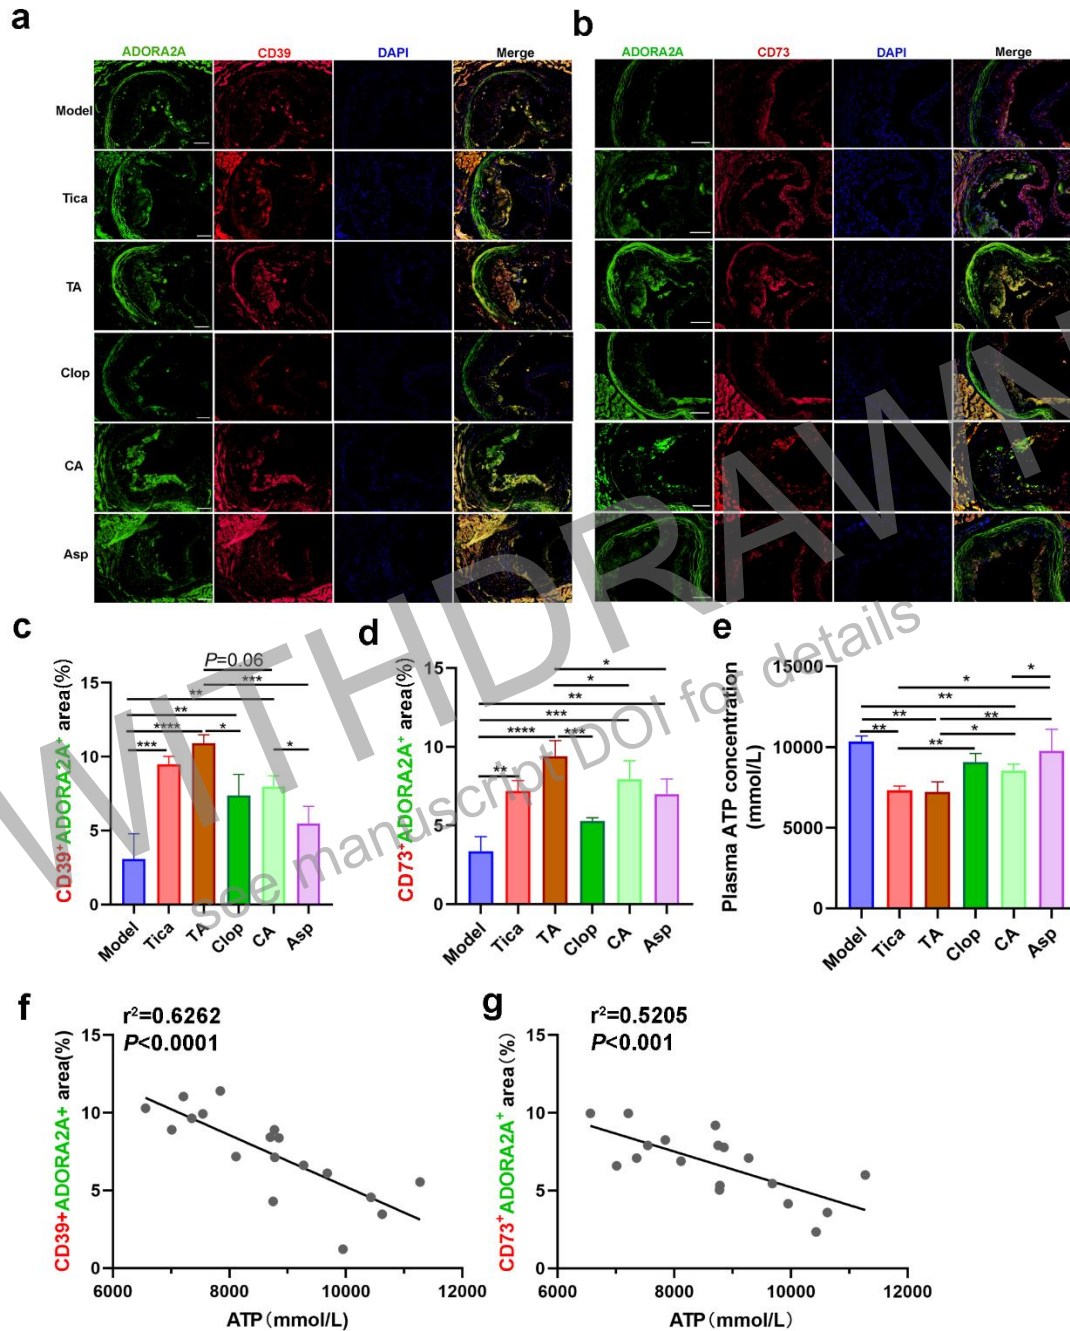

1000

1001

1002

1003

1004

1005

1006

1007

**Figure 7. Expression and relationship among the CD39, CD73, ADORA2A and ATP among diverse groups in atherosclerotic *ApoE*<sup>-/-</sup> mice.** Representative fluorescence images of CD39 (red) with ADORA2A (green) in aortic root lesions from *ApoE*<sup>-/-</sup> mice in diverse groups (a). Nuclei were stained with DAPI (blue). Graph showed the number of CD39<sup>+</sup> ADORA2A<sup>+</sup> cells in indicated groups (c). Representative fluorescence images of CD73 (red) with ADORA2A (green) in aortic root lesions from *ApoE*<sup>-/-</sup> mice in diverse groups (b). Nuclei were stained with DAPI (blue). Graph

1008 showed the number of CD73<sup>+</sup> ADORA2A<sup>+</sup> cells in indicated groups (d). Analysis of  
1009 the concentration of circulating ATP from *ApoE*<sup>-/-</sup> mice (e). Analysis of the correlation  
1010 between the concentration of circulating ATP and the number of CD39<sup>+</sup> ADORA2A<sup>+</sup>  
1011 (f), CD73<sup>+</sup> ADORA2A<sup>+</sup> (g) cells in the atherosclerotic plaques of aortic sinuses from  
1012 *ApoE*<sup>-/-</sup> mice on different treatments. Scale bar, 40 μm. Tica: ticagrelor. TA:  
1013 ticagrelor+aspirin. Clop: clopidogrel. CA: clopidogrel+aspirin. Asp: aspirin.  
1014 ADORA2A: adenosine receptor A2A. DAPI: 4',6-diamidino-2-phenylindole. Data  
1015 were shown as mean ± SEM and were analyzed by one-way ANOVA followed by a  
1016 *post hoc* Tukey's test. \**P*<0.05, \*\**P*<0.01, \*\*\**P*<0.001, \*\*\*\**P*<0.0001.

1017  
1018  
1019  
1020

WITHDRAWN  
see manuscript DOI for details

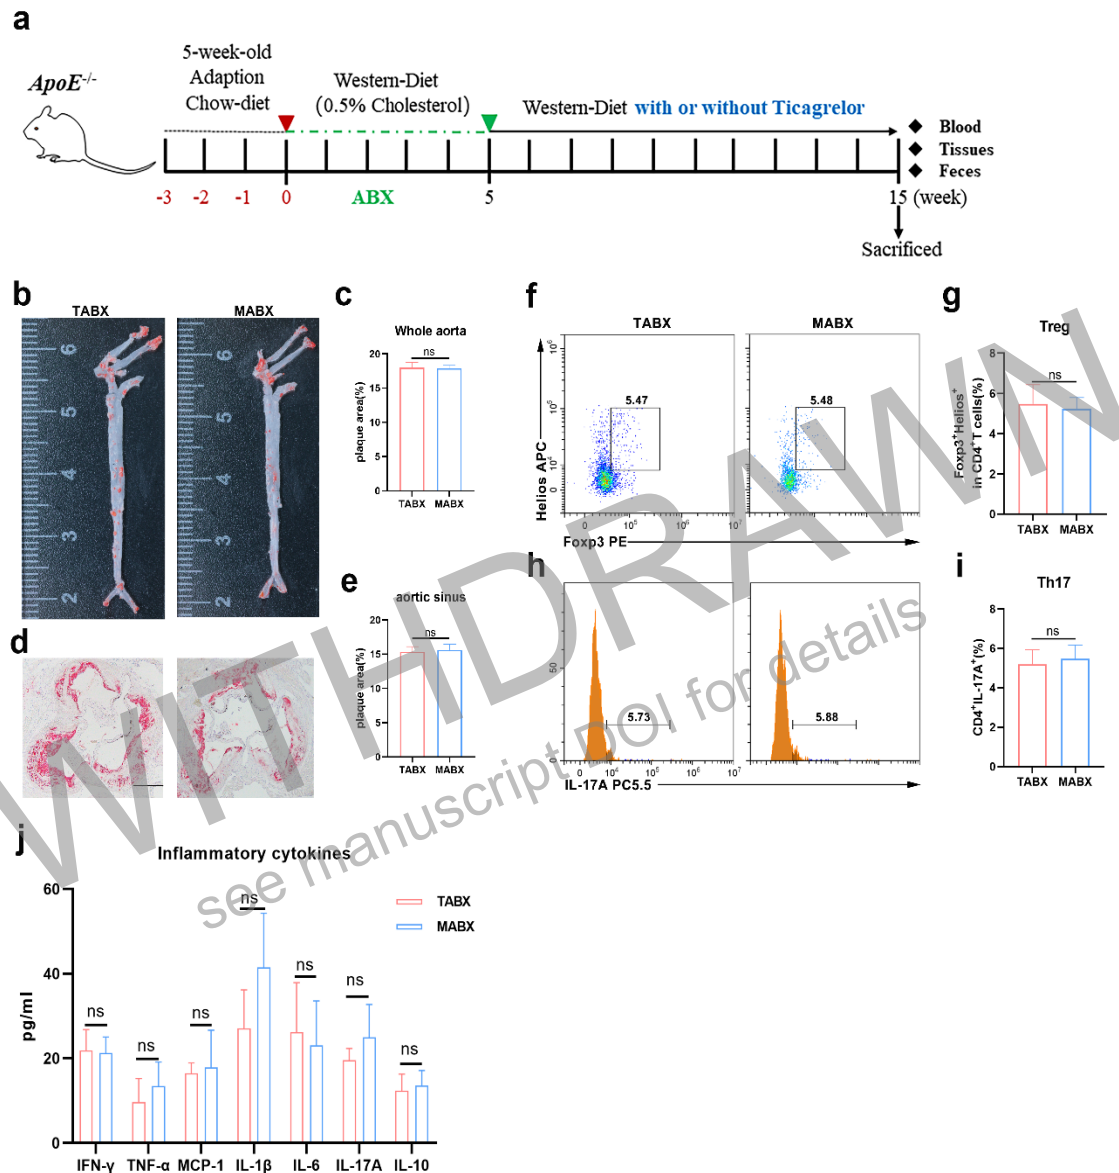

1021

1022 **Figure 8 Effects of Tica on plaque area, circulatory Treg/Th17 cells and**  
 1023 **inflammatory cytokines of *ApoE*<sup>-/-</sup> mice after removed microbiota by ABX.**

1024 Schematic diagram of ABX experiment (a). Representative of Oil Red O in the whole  
 1025 aorta and aorta sinus (b, d). quantifications of Oil Red O in the whole aorta and aorta  
 1026 sinus (c, e). Representative flow cytometry plots (f, h) and quantifications (g, i) of  
 1027 Fopx3<sup>+</sup>Helios<sup>+</sup> Tregs and IL-17A<sup>+</sup> Th17 respectively within the CD4<sup>+</sup> population in  
 1028 blood. Concentration of inflammatory cytokine in plasma between the two groups (j).

1029 n=5 per each group. Scar bar, 200 μm. TABX: ticagrelor-ABX, MABX: Model-ABX.

1030 Data were shown as mean ± SEM and were analyzed by the Student' t-test.
